# 1 **The dynamic relationship between COVID-19 cases and SARS-CoV-2 wastewater concentrations across** 2 **time and space: considerations for model training data sets**

3 Rebecca Schill<sup>1</sup>, Kara L. Nelson<sup>2</sup>, Sasha Harris-Lovett<sup>3</sup>, Rose S. Kantor<sup>2\*</sup>

4

5 1. TUM School of Engineering and Design, Technical University of Munich, Germany

6 2. Civil and Environmental Engineering, University of California, Berkeley, CA, USA

7 3. Berkeley Water Center, University of California, Berkeley, CA, USA

8 \*corresponding author contact: [rkantor@berkeley.edu](mailto:rkantor@berkeley.edu)

## 9 **Abstract**

10 During the COVID-19 pandemic, wastewater-based surveillance has been used alongside  
11 diagnostic testing to monitor infection rates. With the decline in cases reported to public health  
12 departments due to at-home testing, wastewater data may serve as the primary input for  
13 epidemiological models, but training these models is not straightforward. We explored factors  
14 affecting noise and bias in the ratio between wastewater and case data collected in 26  
15 sewersheds in California from October 2020 to March 2022. The strength of the relationship  
16 between wastewater and case data appeared dependent on sampling frequency and population  
17 size, but was not increased by wastewater normalization to flow rate or case count normalization  
18 to testing rates. Additionally, the lead and lag times between wastewater and case data varied  
19 over time and space, and the ratio of log-transformed individual cases to wastewater  
20 concentrations changed over time. This ratio increased sequentially in the Epsilon/Alpha, Delta,  
21 and Omicron BA.1 variant surges of COVID-19 and was also related to the diagnostic testing rate.  
22 Based on this analysis, we present a framework of scenarios describing the dynamics of the case  
23 to wastewater ratio to aid in data handling decisions for ongoing modeling efforts.

24

## 25 **Keywords**

26 Wastewater-based epidemiology (WBE), COVID-19, SARS-CoV-2, variants

27

## 28 **1. Introduction**

29 The COVID-19 pandemic stimulated worldwide research on how wastewater-based surveillance  
30 of SARS-CoV-2 RNA can be used to monitor infections at the population level. Many studies have  
31 found strong correlations between SARS-CoV-2 wastewater RNA samples and COVID-19 cases  
32 via diagnostic testing [1–4], and routine wastewater surveillance has supported decision-makers  
33 in choosing appropriate public health responses [5–7]. With the widespread availability of at-home

34 tests and decreased severity of disease due to vaccination and/or prior infection, the reliability of  
35 reported case data has decreased substantially since December 2021 [8]. To prepare for new  
36 surges due to emerging variants or waning immunity there is a need to build forecasting and  
37 nowcasting models that use wastewater data as a main input [9,10]. For training, these models  
38 require high-quality paired retrospective wastewater and diagnostic testing data. However, both  
39 the wastewater and case count data in these retrospective datasets are imperfect, necessitating  
40 careful consideration of factors contributing to noise and bias prior to modeling.

#### 41 **1.1 Causes of inaccuracies in wastewater data**

42 Concentration of SARS-CoV-2 in wastewater is affected by the number of infected individuals,  
43 but also by precipitation events, infiltration and inflow [11], industrial flow contributions, and many  
44 other factors [12]. Flow rates at wastewater sampling sites can be used to adjust for dilution, but  
45 flow data is not always available, especially for samples collected from manholes or small  
46 wastewater treatment facilities where no flow meter is present. Additionally, the heterogeneity of  
47 sewage samples and the degradation of SARS-CoV-2 in sewers [13] cannot be accounted for by  
48 flow normalization. To address these sources of variability many studies measure cross-assembly  
49 phage (crAssphage) or Pepper Mild Mottle Virus (PMMoV) as biological human fecal indicators  
50 [3,14,15]. Physicochemical parameters such as total nitrogen, ammonia, conductivity, total  
51 suspended solids (TSS), and biological oxygen demand [16,17] can also be used to account for  
52 variation in wastewater strength, but they may be substantially affected by industrial inputs [18]).  
53 Although the US CDC has published recommendations on the wastewater sampling process and  
54 established a reporting database [19], there is currently no overall standard for wastewater SARS-  
55 CoV-2 sampling and analysis. Thus, the causes of noise need to be considered individually for  
56 each dataset.

#### 57 **1.2 Causes of inaccuracies in diagnostic testing data**

58 Diagnostic testing data also includes uncertainty, which may stem from biased allocation of and  
59 access to tests across the population, variation in reporting date assigned to each case (e.g.  
60 symptom onset, testing date, or date of positive test result), underreporting of at-home test results,  
61 and fluctuations in testing rates across time and space [20]. In 2020, the WHO recommended a  
62 threshold of 5% test positivity as a metric of sufficient testing. However, this threshold is only valid  
63 under certain conditions of contact tracing and sufficient testing of symptomatic individuals, and  
64 may only reflect the beginning stages of the pandemic [21]. Generally, case data may be less  
65 reliable when testing rates are low, and as of May 26, 2022, Noh & Danuser (2021) estimated a  
66 total rate of undetected cases of approximately 55% for California [20]. Modeling testing bias was  
67 shown to improve case data accuracy when compared to seroprevalence [22], but normalization  
68 in wastewater testing studies is typically focused only on accounting for wastewater strength.  
69 Although the importance of assessing testing rates prior to modeling was demonstrated in a  
70 recent study [23], to our knowledge, few wastewater studies have directly addressed bias in  
71 diagnostic testing data.

### 72 **1.3 Correlation and the ratio between wastewater and case data**

73 Prior research has used correlation between wastewater and case data as a readout for the  
74 effectiveness of normalization methods, for determination of lead/lag times between datasets,  
75 and as a means to state the value of wastewater monitoring in general [3,4,24–26]. However,  
76 statistical caveats of this analysis are often ignored – for example the fact that the correlation of  
77 two variables that measure the same phenomenon in a time series is inflated due to  
78 autocorrelation [27,28]. Critically, the correlation coefficient reflects the global relationship  
79 between the diagnostic testing and wastewater surveillance data and does not offer an insight  
80 into the development of this relationship over time. For this purpose, the ratio of log-scaled  
81 COVID-19 cases over log-scaled wastewater RNA concentrations may be more appropriate. This  
82 ratio should be representative of shedding per person assuming perfect diagnostic testing and  
83 accurate wastewater data (not accounting for SARS-CoV-2 RNA decay in the sewer). Log-scaling  
84 reduces extreme values in the datasets and mimics a linear relationship between the variables,  
85 as they are not normally distributed [7]. Several studies have proposed using this ratio for analysis,  
86 and have reported values between 0.24 and 0.39, or up to 0.67 after flow normalization [28–31].  
87 However, time series analysis of this ratio has not been performed on real-world data.

### 88 **1.4 Study objectives**

89 The goal of this study was to investigate the nature of the relationship between wastewater and  
90 case data over space and time to provide a basis for future modeling efforts. We present a large,  
91 curated dataset with wastewater and case data collected in California during the first two years of  
92 the COVID-19 pandemic, when case data quality was high. Our analyses reveal the instability of  
93 the relationship between wastewater and case counts and identify three main variables that could  
94 affect models for predicting cases from wastewater: dynamic lead/lag, changes in fecal shedding  
95 due to viral variants, and changes in reporting of individual cases to public health departments.

## 96 **2. Materials & Methods**

### 97 **2.1 Wastewater sample collection and analysis**

98 Raw wastewater samples (n=2480) were collected via 24-hour flow- or time-weighted composite  
99 samplers from 26 sewersheds in California between 1 to 5 times per week (**Table S1, Table S2**).  
100 All sewer systems had separate storm sewers, with the exception of system D, where wastewater  
101 and storm sewers were combined. Sampling dates ranged between October 2, 2020 and June  
102 29, 2022, although not all sewersheds were sampled for the full time period. Sample collection  
103 points were at wastewater treatment plant influent (“sewersheds”) and at pump stations and  
104 manholes (“sub-sewersheds”). Samples were aliquoted (40 mL) into tubes containing the 4S  
105 method lysis mixture, shipped overnight to UC Berkeley, and analyzed according to the laboratory  
106 procedure described by Kantor et al. [32]. Analysis used the 4S method for total RNA extraction  
107 [33] followed by RT-qPCR for SARS-CoV-2 CDC N1, Pepper Mild Mottle Virus, and Bovine  
108 Coronavirus [3]. Quality controls included extraction negative controls, duplicate extractions,  
109 extraction spike-in controls (Bovine Coronavirus), triplicate RT-qPCR reactions, no-template  
110 controls, and standard curves, as described in Kantor et al. [32]. Data not passing quality control  
111 were removed and were replaced with repeated analyses wherever possible.

## 112 2.2 Wastewater data preparation

113 Wastewater data were preprocessed as previously described [32]. Briefly, RT-qPCR outliers were  
114 removed, Cq values were converted to gene copy numbers using an aggregated standard curve,  
115 RT-qPCR replicates were combined by taking the geometric mean, and sample weight was used  
116 to calculate the gene copies per milliliter of wastewater. Extraction replicates were combined by  
117 taking the geometric mean. Five outliers that could be directly attributed to changes in plant  
118 operations or autosampler failures were manually removed.

119 The wastewater concentration was normalized by flow to reduce the effects of dilution by  
120 precipitation, groundwater infiltration, and industrial wastewater. Precipitation data for the years  
121 2020-2022 were downloaded from the NOAA (National Oceanic and Atmospheric Administration)  
122 website for each county [34]. Using this dataset, we calculated the median dry flow for each  
123 sewershed by taking the median of daily flow rates for all days that were recorded as dry  
124 (precipitation < 0.2 inches) within the county. We then used this median dry flow to recalculate  
125 the SARS-CoV-2 RNA concentration in the wastewater and removed the industrial proportion of  
126 flow estimated by the wastewater agencies from the daily flow, as in Eq. 1 (Method 1). A second  
127 variation on this method (Method 2) entailed normalizing values only for days on which  
128 precipitation occurred. For Method 2, values were normalized according to Eq. 1 to offset a  
129 potential dilution and remove the industrial flow proportion, and all other values were normalized  
130 according to Eq. 2 to remove only the industrial flow proportion. We tested different time frames  
131 of up to three days after rain events to account for potential delays in the effect of precipitation on  
132 the dilution of the signal, however, including only the day of the rain event resulted in the highest  
133 correlations (not shown).

$$c(\text{normalized}) = \frac{c(\text{raw})}{100\% - f_{\text{industrial}}} * \frac{q}{q_{\text{dry median}}} \quad \text{Eq. 1}$$

$$c(\text{normalized}) = \frac{c(\text{raw})}{100\% - f_{\text{industrial}}} \quad \text{Eq. 2}$$

134 Where  $c(\text{normalized})$  is the flow-normalized RNA concentration (gc/mL),  $c(\text{raw})$  is the measured  
135 SARS-CoV-2 RNA concentration (gc/mL),  $q$  is the daily flow (MGD),  $q_{\text{dry median}}$  is the median dry  
136 flow (MGD),  $f_{\text{industrial}}$  is the percentage of total flow estimated to come from industrial sources.

137 Normalization with PMMoV, TSS and conductivity was performed according to the  
138 following Eq. 3.

$$c(\text{normalized}) = c(\text{raw}) * \frac{np(\text{raw})}{np(\text{median})} \quad \text{Eq. 3}$$

139 Where  $c(\text{normalized})$  is the normalized SARS-CoV-2 RNA concentration (gc/mL),  $c(\text{raw})$  is the  
140 measured SARS-CoV-2 RNA concentration (gc/mL),  $np(\text{raw})$  is the concentration of the  
141 normalization parameter, and  $np(\text{median})$  is the median concentration of the normalization  
142 parameter.

143 Previous studies recommend applying a 7-day or 10-day moving average to the  
144 wastewater data [23]. However, as the sampling frequencies in our dataset varied over time and  
145 space, lowess smoothing and interpolation was chosen for analysis of lag and lead times and for  
146 data visualization [3]. The smoothing coefficient alpha was defined as  $\alpha = X/n$ , where n was  
147 the total number of data points at a given site. We note that because lowess smoothing depends  
148 on the total number and density of data points, it may have led to slightly different effects on data  
149 from different sites. Unless stated, other analyses were performed on the original wastewater  
150 dataset to maintain the integrity of the recorded data.

### 151 **2.3 COVID-19 case data collection and preparation**

152 Masked daily case counts per sewershed were provided by the California Department of Public  
153 Health, based on sewershed boundaries provided by wastewater agencies. Cases were attributed  
154 to the earlier of 1) the date of diagnostic testing or 2) the reported date of first symptoms, when  
155 both dates were available. Sewershed population estimates were based on reports by the  
156 wastewater agencies and, if unavailable, government census data (**Table S1**). Daily case counts  
157 were masked below 3 cases for sewersheds representing populations of 200,000 or less, and  
158 below 5 cases for populations of 50,000 or less, but instances of zero cases were reported as  
159 zero. During data preparation, masked values were filled with the mean of the masked ranges  
160 (**Table S3**). Case counts and testing rates were normalized to a population of 100,000 and a  
161 centered 7-day moving average value was calculated to smooth weekly periodicity. For log-scaled  
162 analyses, days with zero average cases were dropped prior to analysis.

### 163 **2.4 Normalization of case data to account for diagnostic testing rates**

164 County-level diagnostic testing rate data were acquired from publicly available sources [35]. In  
165 order to compensate for fluctuations in how accurately the case count data reflected the true  
166 incidence of infection, we adjusted the reported cases to the diagnostic testing rates according to  
167 the following equations. Equation 4 linearly inflates the daily cases according to the fraction of  
168 utilized testing capacity on a given day. Equation 5 compensates for a positivity rate bias as  
169 defined by Chiu and Ndeffo-Mbah, 2021 [22].

170

$$n'_c = n_c \frac{n_{t \max}}{n_t} \quad \text{Eq. 4}$$

$$n'_c = \frac{p}{n_t^{0.5}} * 100, \text{ where } p = \frac{n_c}{n_t} \quad \text{Eq. 5}$$

171 Where  $n'_c$  is the adjusted number of cases,  $n_c$  is the original number of cases,  $n_t$  is the number of  
172 tests,  $n_{t \max}$  is the maximum number of tests ever reported on a single day within the study period,  
173 and  $p$  is the test positivity rate. As described in Section 2.3, all values are normalized by  
174 sewershed population size.

## 175 **2.5 Data analysis**

176 The data analysis pipeline was created in Python 3.7 using the Pandas v1.3.5 and Numpy v1.21.6  
177 libraries. The rank correlation of smoothed daily cases with raw and normalized wastewater  
178 sampling data was quantified for each sewershed using the Kendall's Tau b coefficient (SciPy  
179 v1.7.3) [3]. Autocorrelation and lowess smoothing were calculated using Statsmodels v0.10.2,  
180 and data visualization was performed using Plotnine v0.9.0.

181 For analyses of individual surges, the following timeframes were used: the first major  
182 surge we observed (including Epsilon, Alpha, and other minor variants) was defined from the start  
183 of the time series (October 2020) to April 15, 2021, the Delta surge from April 16 to November  
184 26, 2021, and the Omicron BA.1 surge from November 27 to March 15, 2022 based on California  
185 Department of Public Health [36] and COVID-CG [37] and our wastewater sequencing data  
186 (unpublished).

187 To assess the stability of the relationship of log-scaled COVID-19 cases and log-scaled  
188 wastewater SARS-CoV-2 concentrations, we implemented a linear regression model with Scikit-  
189 Learn v1.13 using these inputs during the Epsilon/Alpha variant surge for sewersheds D1, D2, K,  
190 L, and M. This model was then applied to the subsequent Delta and Omicron variant surges and  
191 evaluated using the  $R^2$  goodness-of-fit parameter (**Table S4**). The data analysis pipeline and all  
192 necessary datasets are available at GitHub ([github.com/RebeccaSchill/WBE](https://github.com/RebeccaSchill/WBE)).

## 193 **3. Results and Discussion**

194 We analyzed the SARS-CoV-2 RNA concentration in 2480 wastewater samples from 26  
195 sewersheds sampled between 1-5 times per week from approximately October 2020 - April 2022.  
196 This data was paired with sewershed-specific COVID-19 daily case counts and county-level  
197 diagnostic testing rates and positivity rates. Populations of the sewersheds ranged from 12,000  
198 to 4 million, and flow rates ranged from 0.2 to 243 million gallons per day (**Table S1**). Precipitation  
199 was infrequent (0% - 26% of days in the time series for each site), due to a combination of drought  
200 and mediterranean climate in California.

### 201 **3.1 Denoising via normalization of wastewater and case data**

202 We first compared methods for removing noise from the wastewater and case data. As previously  
203 described, denoising efficacy was evaluated based on changes to Kendall's tau calculated for the  
204 relationship between wastewater and case data (**Table 1**) [3,38]. Flow normalization marginally  
205 improved the correlation for 14 sewersheds, but the effect of normalization was minimal, likely  
206 because of infrequent precipitation (**Table S5**). Normalization of the wastewater data from two  
207 major sewersheds (D1 and D2) to PMMoV, TSS, or conductivity also did not increase correlations  
208 with case data (**Table 1, Table S6**). Other studies have shown that normalization of wastewater  
209 to PMMoV can decrease noise, but successes have been inconsistent and appear to be  
210 dependent on the laboratory method used for virus concentration and extraction, as well as  
211 sewershed size [39–41], and possible dietary variation. Our laboratory method for RNA extraction  
212 (4S, Whitney et al., 2021) lacked bead-beating and therefore may not have achieved complete  
213 and consistent lysis of PMMoV, required for accurate quantification.

214 Normalization of the sewershed-level case counts to the county-level diagnostic testing  
215 rate (Eq. 4) reduced the strength of the correlation to wastewater data. Accounting for the test

216 positivity rate in addition to testing rate in a bias function (Eq. 5) resulted in a more modest  
217 decrease in correlation (**Table 1**). This suggests that additional calibration of the testing bias  
218 model (e.g. with regional seroprevalence data) is likely required.

219

220 **Table 1.** Average Kendall's correlation of log-scaled values (for all chosen sewersheds) before and after  
221 applying different normalization methods to 7-day moving average case data and unsmoothed  
222 wastewater data. Averages represent all 26 sewersheds.

|                                        | Wastewater data normalization methods |                        |                             |       |
|----------------------------------------|---------------------------------------|------------------------|-----------------------------|-------|
| Case data normalization methods        | No normalization                      | Flow (Method 1, Eq. 1) | Flow (Method 2, Eqs. 1 & 2) | PMMoV |
| No normalization                       | 0.57                                  | 0.58                   | 0.57                        | 0.47  |
| Normalized by testing capacity (Eq. 4) | 0.50                                  | 0.50                   | 0.49                        | 0.12  |
| Normalized by testing bias (Eq. 5)     | 0.54                                  | 0.54                   | 0.53                        | 0.14  |

223

### 224 3.2 The correlations between wastewater and case data differed by sewershed

225 Flow-normalized Kendall's tau for wastewater and case data from different sewersheds exhibited  
226 a wide range, from 0.27 to 0.74 (**Figure 1**). In general, larger treatment plants with more frequent  
227 sampling and less masking of individual case data showed the highest tau values (**Table S3**).  
228 Meanwhile, smaller sewersheds appeared subject to higher noise, for several possible reasons.  
229 First, when the total absolute number of infected individuals are low, as is often typical in small  
230 sewersheds, each individual contributes a higher fraction of the total wastewater SARS-CoV-2  
231 concentration, and sampling effects (e.g. missing a flush) can create more noise [12]. Additionally,  
232 the effect of mobility (e.g. one infected person entering or leaving the sewershed) is stronger [42].

233 Second, consistent with recommendations from the US CDC [43], we found that  
234 sewersheds with fewer than 2 samples per week tended to produce weaker correlations, and  
235 these were often smaller treatment facilities. This is in line with reports of lower sampling  
236 capacities at smaller wastewater treatment plants [44]. Many of these small sewersheds also had  
237 fewer than 50 total sampling events (**Table S1**). Additionally, we note that the time series of  
238 wastewater and case counts were autocorrelated (Durbin-Watson statistic  $d < 1.5$  in all  
239 sewersheds), and autocorrelation may have increased with increasing sampling frequency,  
240 affecting tau values differently in each sewershed.

241 Third, a larger proportion of daily case data was masked in the smallest sewersheds, with  
242 a median value of 45% of data masked (**Table S3**). Two sewersheds with a masking proportion  
243 >95% were removed from further analyses. Lastly, within-sewershed fluctuations in diagnostic  
244 testing rates may also have led to differences in wastewater-case correlation between

245 sewersheds [45] (see Section 3.6). We were unable to assess disparities in testing rates given  
246 that testing rate data were available at the county level only, which may not be representative of  
247 individual sewersheds. Overall, the collection of high-resolution datasets improves the reliability  
248 of the relationship between case counts and wastewater data and the accuracy of forecasting  
249 models [46]. These findings motivate policy to report detailed diagnostic testing and COVID-19  
250 case data and to provide support for smaller communities to increase wastewater sampling  
251 frequency in locations where case data may be the least accurate [47].

252

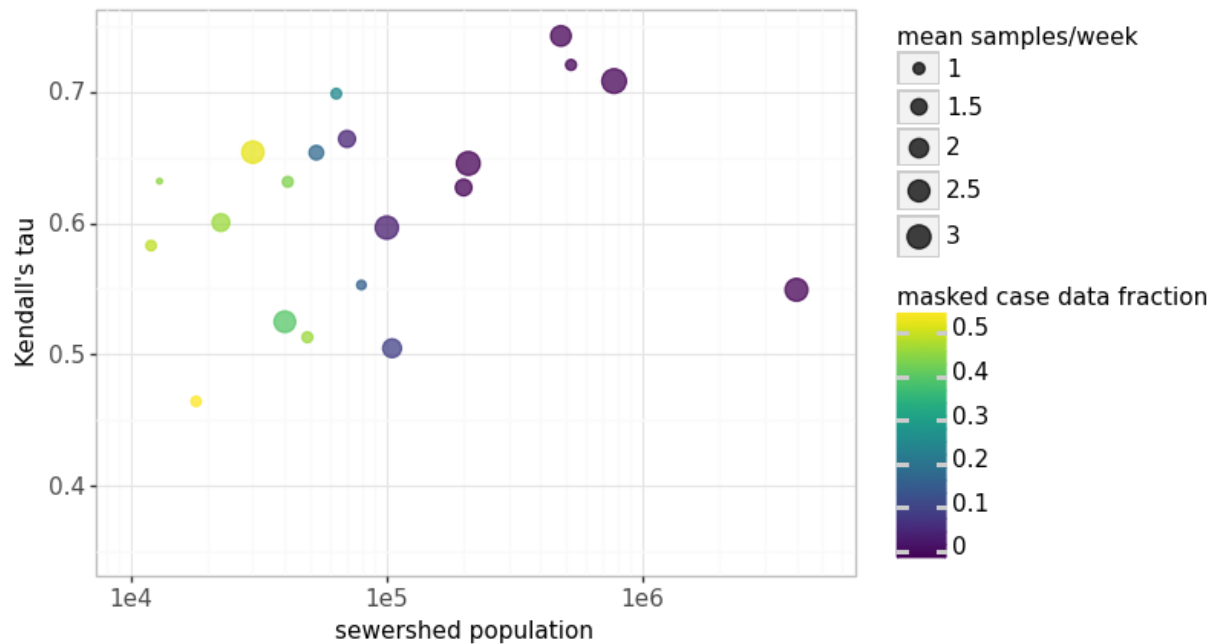

253 **Figure 1.** The Kendall's correlation coefficient between log-scaled cases and unsmoothed log-scaled  
254 wastewater SARS-CoV-2 RNA concentrations (y-axis) increased with increasing sewershed population (x-  
255 axis) and was affected by weekly sampling frequency (point size) and by the fraction of case data that was  
256 masked (point color).  
257

### 258 3.3 Lag between case data and wastewater data was dynamic over time and space

259 Modeling work may need to take into consideration the lead/lag between case counts and  
260 wastewater data. As previous studies have reported wastewater lead times over case data of  
261 between 0 and 14 days [48], we hypothesized that lead time could vary substantially by  
262 sewershed and over time due to factors such as evolving virus variants, sewage travel distance,  
263 and access to and frequency of diagnostic testing [49]. To assess lead/lag times, we first  
264 smoothed the wastewater data to remove noise (see Methods; Section 2.2), then calculated the  
265 cross-correlation Kendall's tau-b between the flow-normalized wastewater data and case data  
266 shifted in each direction by 1 to 14 days (see Methods; **Figure S1A**). A wastewater lag/lead time  
267 between -3 days and +4 days was detected in four of the seven sewersheds that were sampled  
268 throughout the entire time series, but the corresponding increases in Kendall's tau-b were very  
269 low with a maximum increase of 3%.



270 We next examined whether the wastewater lead/lag changed during periods when  
271 different variants predominated. Overall, varying wastewater lead times from +1 to +13 days were  
272 observed in 12 of 17 sewersheds during the Epsilon/Alpha variant-dominated surge. This lead  
273 time was also observed in 14 out of 20 sewersheds during the Delta variant surge but faded during  
274 the Omicron variant surge, where wastewater data lagged and led case data in an equal number  
275 of sewersheds (**Figs. S1B, S1C, S1D**). The dynamic behavior of the time shift between  
276 wastewater and case data across variants is demonstrated in detail at two sewersheds (D1 and  
277 K) in **Figure 2**. Notably, during the first surge we observed, the peaks in wastewater and case  
278 data are not aligned, resulting in very long lead times. This is likely due to a combination of testing  
279 fluctuations over the winter holidays and the multiple overlapping surges of different variants  
280 (Epsilon, Alpha, Gamma, and others). The wastewater lead time lessened significantly during the  
281 Delta surge in both sewersheds and disappeared during the Omicron surge. This aligns with  
282 previous reports of reduced wastewater lead times after the Alpha surge [7,50].

283 The use of cross-correlation to determine lag/lead times between case data and  
284 wastewater data is based on the assumption that there is a static lag between the two datasets.  
285 Static lag could reasonably stem from near-constant factors such as sewer transit time (constant  
286 within a sewershed) or delay between infection and symptom onset that would trigger diagnostic  
287 testing (assumed constant for each variant). However, our findings of dynamic lag over time and  
288 across sewersheds suggest that other factors are at play. Wastewater sampling frequency,  
289 population-level immunity, or changes in diagnostic testing strategy/availability differed between  
290 surges and locations and likely affected lead times. Previous studies have highlighted that lead  
291 time calculations need to be adapted to different purposes, for example real-time decision-making  
292 versus retrospective data analysis [48]. In this study, due to the applied smoothing methods, lag  
293 calculations do not represent real-time data availability, but instead reveal a potential delay in  
294 measurable signal between wastewater and diagnostic testing. Our findings of dynamic lead times  
295 suggest that cross-correlation, and by extension, simple linear regression models (**Table S4**), are  
296 therefore insufficient for describing the relationship between case and wastewater data for  
297 retrospective data analysis, and dynamic lead times will affect input data for modeling.

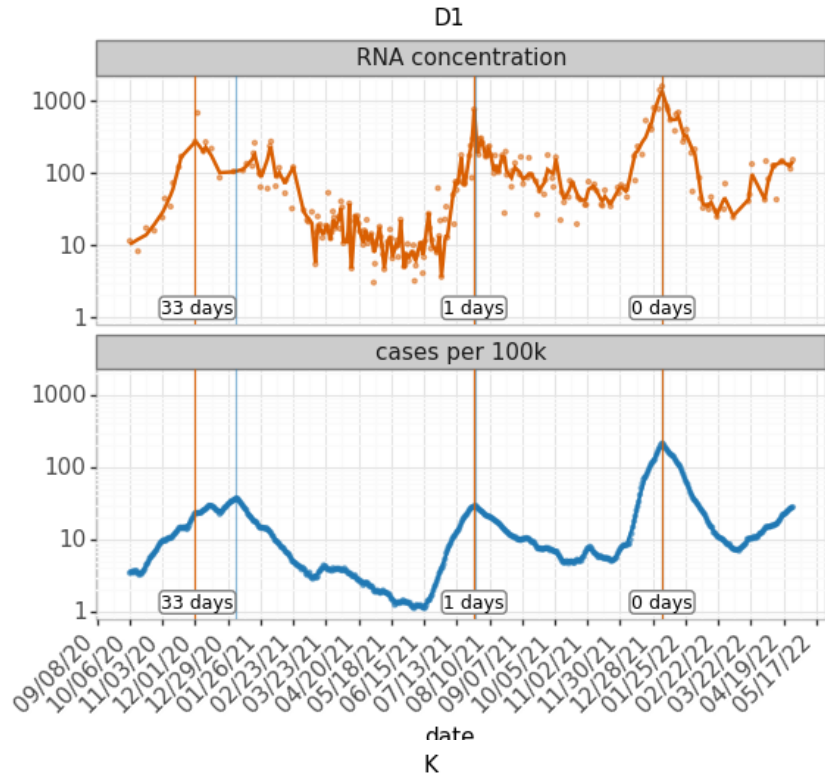

298

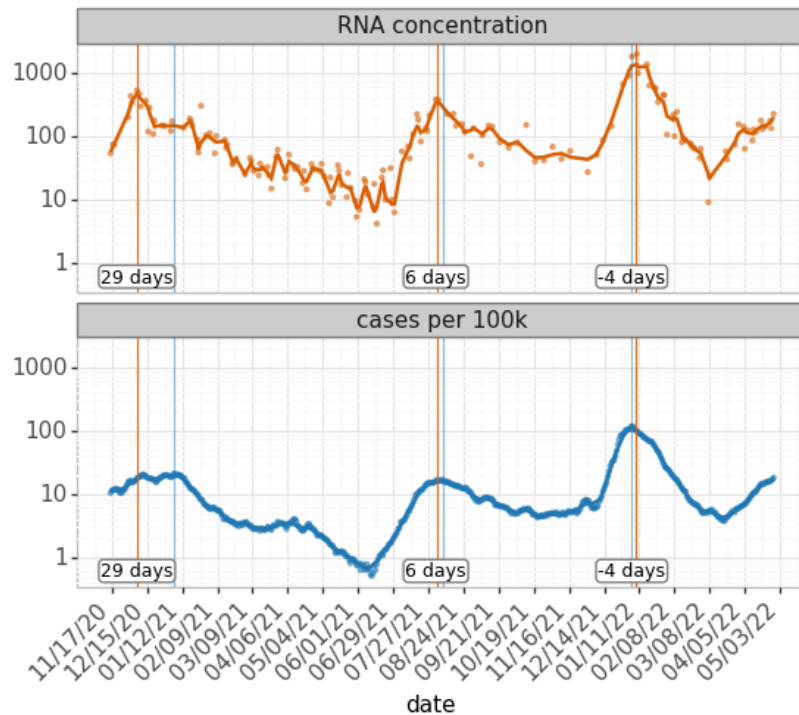

299

300 **Figure 2.** Lag between wastewater and individual case data varied over time and between  
301 sewersheds. Flow-adjusted wastewater SARS-CoV-2 concentrations in gene copies per milliliter  
302 (orange), COVID-19 cases per 100,000 people (blue), including a lowess smoother (alpha=0.05)  
303 are shown for two sewersheds. Sewershed D1 (top) represents a population of 750,000, with high

304 sampling frequency, while sewershed K (bottom) represents 480,000 people with intermittently  
305 reduced sampling frequency. Vertical lines indicate minima and maxima of the timeseries of cases  
306 (blue) and wastewater (orange). Labels indicate the wastewater lead time at the surge peak in  
307 days.

### 308 3.4 The ratio of cases per wastewater RNA was not constant over time and space

309 To explore the dynamic nature of the relationship between wastewater and case data, we  
310 calculated the ratio of  $\log(\text{cases})$  per  $\log(\text{wastewater concentration})$  (see **Figure S2** for example).  
311 For five large sewersheds sampled continuously throughout the analyzed time frame (**Figure 3**),  
312 we found that the magnitude of the ratio was different at each sewershed, likely affected by the  
313 accuracy of the population estimates. The ratio also changed over time: during the Epsilon/Alpha  
314 surge, the ratio remained stable overall before decreasing to a minimum just before the peak of  
315 the Delta surge. The ratio then recovered and increased to a maximum during the first Omicron  
316 surge. Towards the end of this surge, the ratio decreased once more. These developments were  
317 similar at sewersheds D1, D2, and K, but less pronounced or more stochastic in sewersheds L  
318 and M and others where sampling was less frequent (**Figure 3**; see **Figure S3** for all sewersheds).

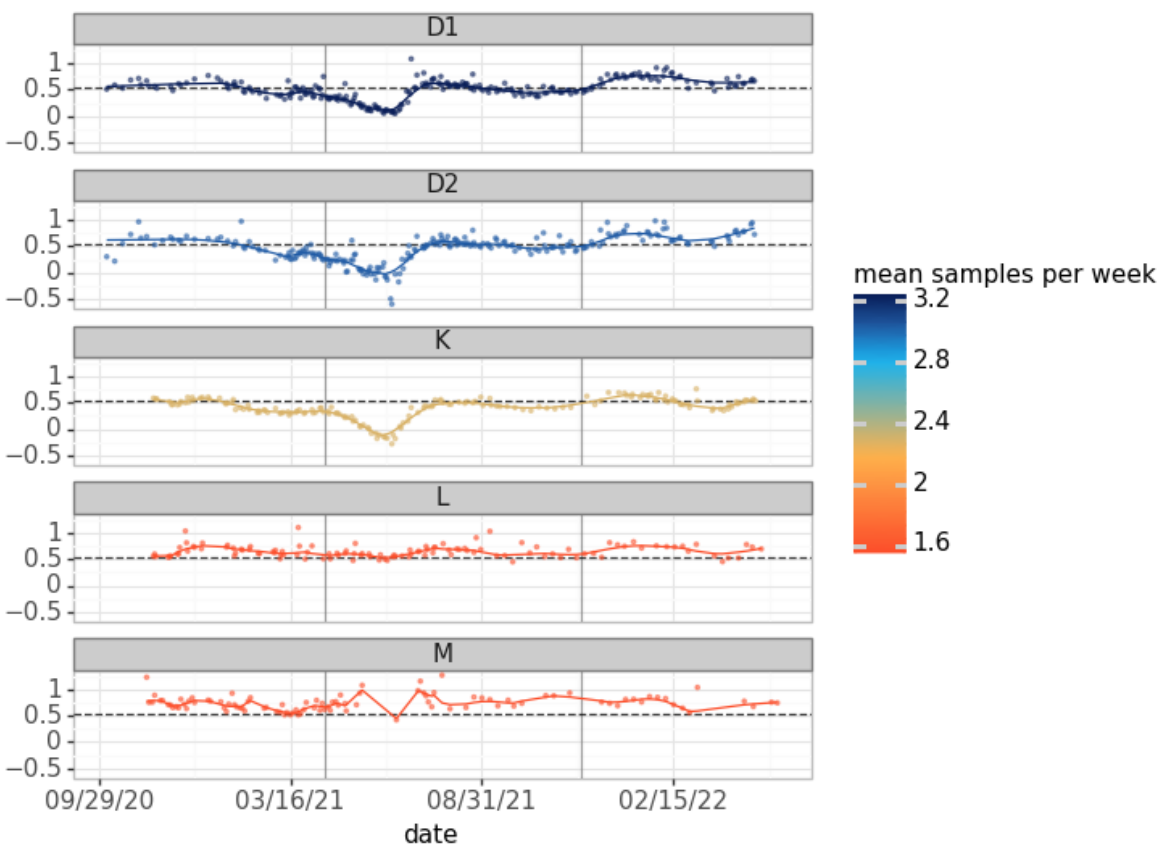

319

320 **Figure 3.** Ratio of  $\log(\text{cases per 100,000})$  over  $\log(\text{wastewater concentration})$  at sewersheds D1  
321 ( $n=262$ ), D2 ( $n=244$ ), K ( $n=172$ ), L ( $n=121$ ), and M ( $n=131$ ), for three surges (separated by vertical  
322 gray lines). Smoothed lines were generated with lowess ( $\alpha=0.05$ ), and the dashed line  
323 represents the median ratio across all 5 sewersheds (0.55). For each sewershed shown, case

324 data masking was below 5% of all data points. Two outliers were removed at sewershed M for  
325 visualization.

### 326 **3.5 Ratio of cases per wastewater RNA differed by variant**

327 To test for the effect of evolving virus variants on wastewater surveillance data, we calculated  
328 point estimates for the ratios in each sewershed as follows: for each variant surge, we identified  
329 the maximum number of cases per 100,000 people (centered 7-day average) and the maximum  
330 lowess-smoothed wastewater concentration reported. Then, we calculated the ratio by dividing  
331 the log-scaled maximum cases by the log-scaled maximum wastewater concentration. We could  
332 not isolate the Epsilon and Alpha variants, as the surges partially coincided. Although our analysis  
333 was limited to 5 sewersheds, we observed a significant increasing trend in the ratio from the Delta  
334 variant to the Omicron variant (**Figure 4**). The decrease between the Epsilon/Alpha and Delta  
335 variants could be observed as well but the difference was not statistically significant. The ratio  
336 appears consistently lower for sewershed K but sewershed-specific differences were not  
337 significant (Kruskall-Wallis,  $p = 0.429$ )

338 Additionally, we found that a linear regression model trained to predict case data from  
339 flow-normalized unsmoothed wastewater data for Alpha/Epsilon surge deteriorated in fit during  
340 the Delta and Omicron BA.1 variants (see **Table S4**). Overall, these findings agree with the reports  
341 of increased fecal and oro-nasopharyngeal viral loads during the Delta surge [51,52] and with  
342 reduced fecal shedding observed with the Omicron variant [53,54]. While SARS-CoV-2 oro-  
343 nasopharyngeal viral load was reportedly reduced after vaccination [55–57], more research is  
344 needed to determine potential effects of vaccination and prior infection on fecal shedding rates.

345

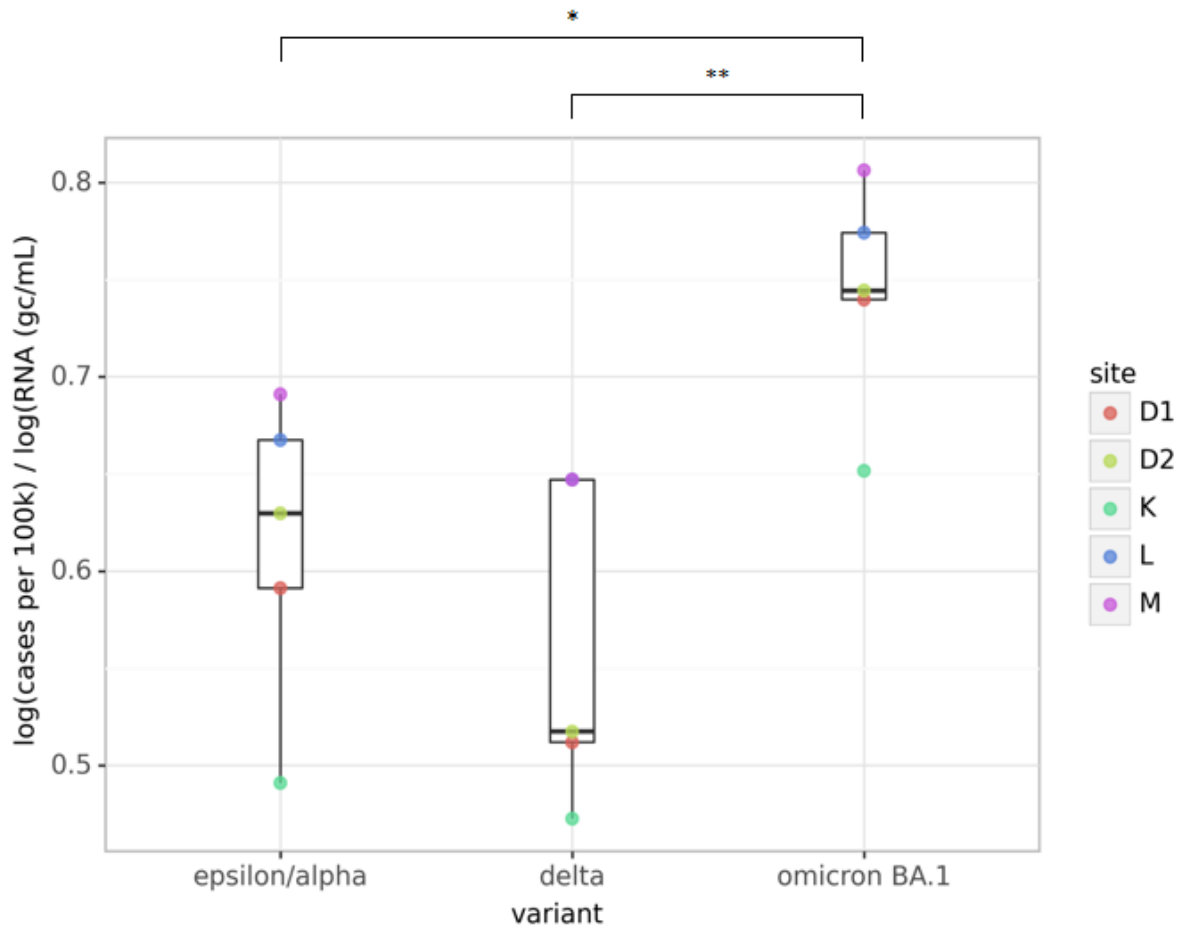

346

347 **Figure 4.** The ratio of log(cases) over log(wastewater RNA) changes for each variant at  
348 sewersheds D1, D2, K, L, and M. The ratio was calculated from the peaks of the three surges  
349 after lowess smoothing ( $\alpha = 5 / \text{total samples}$ ). The difference between the Omicron BA.1  
350 variant and the other variants was statistically significant (Mann-Whitney, \*  $p = 0.032$ , \*\*  $p =$   
351  $0.008$ ), while the difference between the Epsilon/Alpha and other variants to the Delta variant was  
352 not ( $p = 0.421$ ).

### 353 3.6 Diagnostic testing rates influenced the cases-to-wastewater RNA ratio

354 Given the drop in the cases-to-wastewater RNA ratio during the pre-Delta period, we  
355 hypothesized that changes in diagnostic testing dynamics might influence this ratio. Indeed, we  
356 observed that low testing rates corresponded with low ratios throughout the time series, including  
357 during the pre-Delta trough (**Figure 5**). Correlations between cases-to-wastewater ratios and  
358 diagnostic testing rates over time were significant in several sewersheds (**Table S7**). Notably, the  
359 strengths of these relationships differed for sewersheds in the same county (**Table S7**),  
360 suggesting that sewershed-level testing rates differed from those at the county level or the quality  
361 of wastewater data differed for sewersheds in the same county. Additionally, the measurement  
362 uncertainty was likely higher during periods of low case counts and low wastewater

363 concentrations, which could also have contributed to the change in the ratio observed during  
364 these periods.

365 Although low diagnostic testing rates may partially explain low ratios between surges, we  
366 note that the cases-to-wastewater RNA ratio recovers more quickly than the testing rates,  
367 suggesting that undertesting cannot be the only cause of lower ratios (**Figure 5**). This is  
368 underlined by the fact that normalizing by testing rates (via Eq. 4 and 5) did not completely flatten  
369 the cases-to-wastewater ratio over time (**Figure S4**). Critically, differences in the slopes of the  
370 case and wastewater curves may also have affected the ratio between them. As has been shown  
371 in previous studies [23], we suggest that proportionally more cases remained undetected at the  
372 very beginning of a surge until the diagnostic testing rates adapted, as the case curves increased  
373 more steeply than the wastewater curves before the peak of each surge (**Figure S5**). This affected  
374 the ratio as well (**Table 2**). After the peak of each surge, the decline in wastewater RNA  
375 concentrations was more gradual than the decline in cases, perhaps due to prolonged fecal  
376 shedding [58]. We echo the suggestion by Daza-Torres (2022), that input data for modeling  
377 should be drawn from time periods with adequate testing. Future work could assess testing  
378 behavior and the distribution of tests across the population (e.g. symptomatic vs. asymptomatic,  
379 retesting, etc.), to further adjust case data.

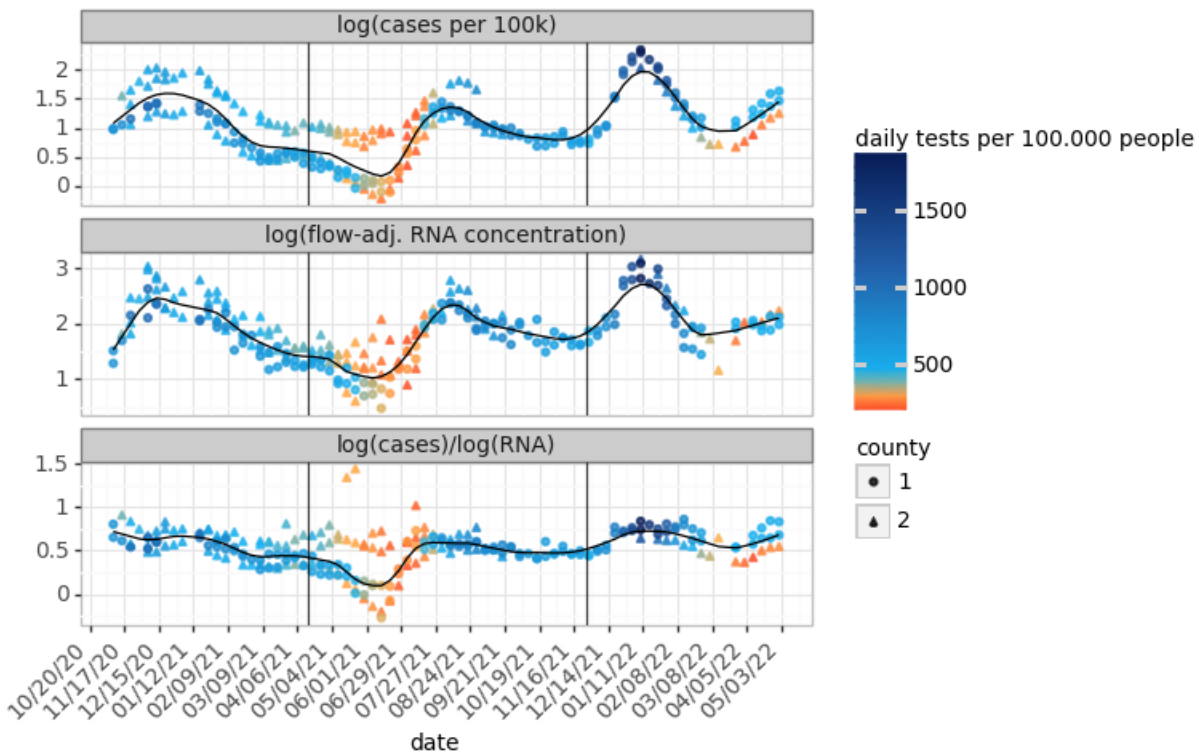

380

381 **Figure 5.** Time series from 5 sewersheds (D1, D2, K, L, M) of the median weekly COVID-19  
382 cases per day (top), median weekly flow-adjusted wastewater SARS-CoV-2 RNA (gc/mL)  
383 (middle) and the ratio between them (bottom). For each sewershed, for a given week, a minimum  
384 of two data points was required for a weekly median to be shown. The color of the data points  
385 represents the daily diagnostic testing rate per 100,000 people, and the shape indicates the  
386 county in which the sewershed is located.

387 **4. Conclusions**

388 Based on our observations, we define a framework of key factors that may affect the cases-to-  
 389 wastewater SARS-CoV-2 RNA ratio over time, encompassing variation in diagnostic testing rates,  
 390 changes to fecal shedding, and fluctuations in the temporal off-set between wastewater  
 391 surveillance and case count data (**Table 2**). Future efforts could model these factors to come to  
 392 a more accurate understanding of the ground truth case counts. Additional work could also  
 393 incorporate hospitalization [7], vaccination, mobility and other data types that were not considered  
 394 here. Importantly, modeling work should ensure that the case data used to train a predictive model  
 395 are drawn from a period(s) when testing was adequate [23]. Additionally, we found that within our  
 396 dataset, wastewater data varied in quality, and our analysis was limited by the changing frequency  
 397 of wastewater sample collection throughout each time series. Thus, wastewater data to be used  
 398 for modeling requires careful curation and potentially smoothing. However, we observed that  
 399 smoothing led to the loss of extreme values, many of which were important maxima and minima.  
 400 Smoothing can hide or delay rapid changes in the time series, affecting the lead/lag between  
 401 wastewater data and case counts. Future work should compare raw and smoothed model inputs  
 402 to ensure that smoothing maintains the integrity of the data.

403 Looking forward, once sewershed-specific models have been established, subsequent  
 404 modeling will benefit from the fact that the sewersheds themselves will remain relatively  
 405 consistent: the structure of the sewer system itself, transit time of sewage, noise from  
 406 precipitation, and industrial discharge can be taken into account with ongoing data and existing  
 407 normalization methods. These models will be independent from case counts and testing, and thus  
 408 independent from lead/lag times relative to cases. The key factor subject to change will be fecal  
 409 shedding rate and duration (**Table 2**). Models will require updated *in vivo* studies of fecal shedding  
 410 profiles to adjust for new SARS-CoV-2 variants and evolving immunity in the population.

411 **Table 2.** Scenarios that can lead to changes in the ratio of log transformed case to wastewater  
 412 data.

| Ratio           | Changes to factors contributing to case data                                                        | Changes to factors contributing to wastewater signal                                                                                   | Both                                                                                                                                                     |
|-----------------|-----------------------------------------------------------------------------------------------------|----------------------------------------------------------------------------------------------------------------------------------------|----------------------------------------------------------------------------------------------------------------------------------------------------------|
| <b>Increase</b> | Increased diagnostic testing rates without proportional increase in incidence                       | Increase in incidence that is captured in the case data but is not reflected in wastewater data due to lower shedding rate or duration | Tested cases increase before this is reflected in the wastewater data<br><br>Tested cases increase more steeply than is reflected in the wastewater data |
| <b>Decrease</b> | Increase in incidence reflected in wastewater data is not reported in case data due to undertesting | Higher wastewater values due to increased shedding rate or duration                                                                    | Wastewater values increase before cases reflect the change (undertesting)                                                                                |

413

## 414 **Supplementary Materials**

415 **Figure S1A.** Kendall's correlations between wastewater SARS-CoV-2 RNA and COVID-19  
416 cases per 100,000 people without timeshift (left) and cross-correlation heatmap of changes in  
417 Kendall's tau after shifts of up to -14 to +14 days were applied to case data (right). The  
418 maximum correlation is indicated by gray points. Prior to correlation calculations, all wastewater  
419 data were flow-normalized, log-scaled, and lowess smoothed (with interpolation) to reduce  
420 noise, and all case data were converted to 7-day moving averages and log-scaled. Sewersheds  
421 were included only if they were sampled throughout the entire time series.

422 **Figure S1B.** Kendall's correlations between wastewater SARS-CoV-2 RNA and COVID-19  
423 cases per 100,000 people during the Epsilon/Alpha variant-dominated surge without time shift  
424 (left) and after shifts of up to -14 to +14 days were applied to case data, (right), as in Figure  
425 S1A.

426 **Figure S1C.** Kendall's correlations between wastewater SARS-CoV-2 RNA and COVID-19  
427 cases per 100,000 people during the Delta variant-dominated surge without time shift (left) and  
428 after shifts of up to -14 to +14 days were applied to case data, (right), as in Figure S1A.

429 **Figure S1D.** Kendall's correlations between wastewater SARS-CoV-2 RNA and COVID-19  
430 cases per 100,000 people during the Omicron BA.1 variant-dominated surge without time shift  
431 (left) and after shifts of up to -14 to +14 days were applied to case data, (right), as in Figure  
432 S1A.

433 **Figure S2.** Time series of flow-normalized wastewater SARS-CoV-2 RNA concentration (gc/mL,  
434 orange), 7-day moving average COVID-19 cases per 100,000 people (blue), the ratio of log-  
435 scaled cases over log-scaled RNA concentration (gray), and lowess-smoothed curves (alpha =  
436 0.05), at site D1 from August 25, 2020 to May 31, 2022.

437 **Figure S3.** Time series of the ratio between  $\log_{10}(\text{COVID-19 cases})$  and  $\log_{10}(\text{wastewater SARS-CoV-2 RNA concentration})$  at 24 sites. Graphs are sorted by sewershed population and  
438 colored by mean weekly sampling frequency. Fraction of case data that is masked is  
439 represented by the following: \*0-0.05 \*\*0.05-0.33 \*\*\*>0.33. One outlier at site F was removed for  
440 visualization.  
441

442 **Figure S4.** Lowess-smoothed (alpha=0.1) ratio of  $\log(\text{cases})$  to  $\log(\text{wastewater concentration})$   
443 non-normalized, normalized by testing capacity (Eq. 4) and normalized by testing bias (Eq. 5) at  
444 24 sewersheds. Averages were calculated for each week and each sewershed. For each  
445 sewershed, for a given week, a minimum of two data points was required for inclusion.

446 **Figure S5.** Lowess smoothed time series of log-scaled, flow-normalized wastewater SARS-CoV-  
447 2 RNA concentration (gc/mL, orange) and log-scaled, 7-day moving average COVID-19 cases  
448 per 100,000 people (blue) at sites D1, D2, K, L, and M. Both time series were rescaled by defining  
449 the minimum as 0 and the maximum as 1.

450 **Table S1.** Overview of sites and sampling information.



451 **Table S2.** Input wastewater dataset.

452 **Table S3.** Summary of sewersheds grouped by serviced population.

453 **Table S4.** R2 values of linear regression trained on the relationship of log-scaled COVID-19  
454 cases and log-scaled wastewater SARS-CoV-2 RNA concentration during Alpha/Epsilon variant  
455 surge in each sewershed.

456 **Table S5.** Differences in Kendall's Tau-b correlation coefficient after flow normalization using  
457 two methods (see Section 2.2), in relation to the coefficient of variation of flow at the respective  
458 sites.

459 **Table S6.** Kendall's tau values for the correlation between log10(cases per 100,000) and  
460 log10(wastewater SARS-CoV-2 RNA concentrations) with normalization.

461 **Table S7.** Kendall's correlation coefficient for the relationship between sewershed cases-to-  
462 wastewater RNA and county-level testing rate.

### 463 **Funding Information**

464 Funding was provided by the Catena Foundation, through individual contracts with counties in California  
465 who wish to remain anonymous, and by the California Department of Public Health (CDPH). Initial work  
466 was funded by seed grants from the Innovative Genomics Institute (IGI) and Center for Information  
467 Technology Research in the Interest of Society (CITRIS).

### 468 **Acknowledgements**

469 We thank the members of the UC Berkeley wastewater testing laboratory, including Joaquin  
470 Bradley Silva, Christina Lang, Matt Metzger, Melissa Thornton, student laboratory assistants,  
471 and volunteers. We are deeply grateful to our partners at wastewater agencies in California for  
472 sample collection and provision of wastewater treatment plant operations data. We  
473 acknowledge CDPH for providing sewershed-bounded case data and county-level testing  
474 rate/positivity rate data and for helpful discussions during the data collection phase of this work.

### 475 **Author Contributions**

476 Conceptualization, RSK, KLN, and SHL; Methodology, RS, RSK; Formal Analysis, RS; Data  
477 Curation, RS, RSK; Writing – Original Draft Preparation, RS, RSK; Writing – Review & Editing,  
478 RSK, KLN, and SHL; Visualization, RS; Supervision, RSK, KLN; Project Administration, RSK;  
479 Funding Acquisition, RSK, KLN, and SHL. All authors read and approved the final manuscript.

### 480 **Institutional Review Board Statement**

481 Ethical review and approval were waived for this study, due to the anonymized, aggregated nature  
482 of the data.

## 483 **Data Availability Statement**

484 All wastewater data are available in the Supplementary Materials. For privacy reasons, COVID-  
485 19 case data used in this study are not shared and may be requested directly from the  
486 California Department of Public Health.

## 487 **Conflicts of Interest**

488 The authors declare no conflict of interest.

## 489 **References**

- 490 1. Bonanno Ferraro, G.; Veneri, C.; Mancini, P.; Iaconelli, M.; Suffredini, E.; Bonadonna, L.;  
491 Lucentini, L.; Bowo-Ngandji, A.; Kengne-Nde, C.; Mbaga, D.S.; et al. A State-of-the-Art  
492 Scoping Review on SARS-CoV-2 in Sewage Focusing on the Potential of Wastewater  
493 Surveillance for the Monitoring of the COVID-19 Pandemic. *Food Environ. Virol.* **2021**,  
494 doi:10.1007/s12560-021-09498-6.
- 495 2. Cluzel, N.; Courbariaux, M.; Wang, S.; Moulin, L.; Wurtzer, S.; Bertrand, I.; Laurent, K.;  
496 Monfort, P.; Gantzer, C.; Guyader, S.L.; et al. A Nationwide Indicator to Smooth and  
497 Normalize Heterogeneous SARS-CoV-2 RNA Data in Wastewater. *Environ. Int.* **2022**, *158*,  
498 106998, doi:10.1016/j.envint.2021.106998.
- 499 3. Greenwald, H.D.; Kennedy, L.C.; Hinkle, A.; Whitney, O.N.; Fan, V.B.; Crits-Christoph, A.;  
500 Harris-Lovett, S.; Flamholz, A.I.; Al-Shayeb, B.; Liao, L.D.; et al. Tools for Interpretation of  
501 Wastewater SARS-CoV-2 Temporal and Spatial Trends Demonstrated with Data Collected  
502 in the San Francisco Bay Area. *Water Res. X* **2021**, *12*, 100111,  
503 doi:10.1016/j.wroa.2021.100111.
- 504 4. Ho, J.; Stange, C.; Suhrborg, R.; Wurzbacher, C.; Drewes, J.E.; Tiehm, A. *SARS-CoV-2*  
505 *Wastewater Surveillance in Germany: Long-Term PCR Monitoring, Suitability of*  
506 *Primer/Probe Combinations and Biomarker Stability*; Epidemiology, 2021;
- 507 5. Diamond, M.B.; Keshaviah, A.; Bento, A.I.; Conroy-Ben, O.; Driver, E.M.; Ensor, K.B.;  
508 Halden, R.U.; Hopkins, L.P.; Kuhn, K.G.; Moe, C.L.; et al. Wastewater Surveillance of  
509 Pathogens Can Inform Public Health Responses. *Nat. Med.* **2022**, *28*, 1992–1995,  
510 doi:10.1038/s41591-022-01940-x.
- 511 6. Harris-Lovett, S.; Nelson, K.L.; Kantor, R.; Korfmacher, K.S. Wastewater Surveillance to  
512 Inform Public Health Decision Making in Residential Institutions. *J. Public Health Manag.*  
513 *Pract.* **2022**, 10.1097/PHH.0000000000001636, doi:10.1097/PHH.0000000000001636.
- 514 7. Hopkins, L.; Persse, D.; Caton, K.; Ensor, K.; Schneider, R.; McCall, C.; Stadler, L.B.  
515 Citywide Wastewater SARS-CoV-2 Levels Strongly Correlated with Multiple Disease  
516 Surveillance Indicators and Outcomes over Three COVID-19 Waves. *Sci. Total Environ.*  
517 **2023**, *855*, 158967, doi:10.1016/j.scitotenv.2022.158967.
- 518 8. Usher, A.D. FIND Documents Dramatic Reduction in COVID-19 Testing. *Lancet Infect. Dis.*  
519 **2022**, *22*, 949, doi:10.1016/S1473-3099(22)00376-0.
- 520 9. Huisman, J.S.; Scire, J.; Caduff, L.; Fernandez, -Cassi Xavier; Ganesanandamoorthy, P.;  
521 Kull, A.; Scheidegger, A.; Stachler, E.; Boehm, A.B.; Hughes, B.; et al. Wastewater-Based  
522 Estimation of the Effective Reproductive Number of SARS-CoV-2. *Environ. Health*  
523 *Perspect.* **2022**, *130*, 057011, doi:10.1289/EHP10050.
- 524 10. Soller, J.; Jennings, W.; Schoen, M.; Boehm, A.; Wigginton, K.; Gonzalez, R.; Graham,  
525 K.E.; McBride, G.; Kirby, A.; Mattioli, M. Modeling Infection from SARS-CoV-2 Wastewater  
526 Concentrations: Promise, Limitations, and Future Directions. *J. Water Health* **2022**, *20*,  
527 1197–1211, doi:10.2166/wh.2022.094.
- 528 11. McCall, C.; Fang, Z.N.; Li, D.; Czubai, A.J.; Juan, A.; LaTurner, Z.W.; Ensor, K.; Hopkins,

- 529 L.; Bedient, P.B.; Stadler, L.B. Modeling SARS-CoV-2 RNA Degradation in Small and  
530 Large Sewersheds. *Environ. Sci. Water Res. Technol.* **2022**, *8*, 290–300,  
531 doi:10.1039/D1EW00717C.
- 532 12. Wade, M.J.; Lo Jacomo, A.; Armenise, E.; Brown, M.R.; Bunce, J.T.; Cameron, G.J.; Fang,  
533 Z.; Farkas, K.; Gilpin, D.F.; Graham, D.W.; et al. Understanding and Managing Uncertainty  
534 and Variability for Wastewater Monitoring beyond the Pandemic: Lessons Learned from  
535 the United Kingdom National COVID-19 Surveillance Programmes. *J. Hazard. Mater.*  
536 **2022**, *424*, 127456, doi:10.1016/j.jhazmat.2021.127456.
- 537 13. Bivins, A.; Greaves, J.; Fischer, R.; Yinda, K.C.; Ahmed, W.; Kitajima, M.; Munster, V.J.;  
538 Bibby, K. Persistence of SARS-CoV-2 in Water and Wastewater. *Environ. Sci. Technol.*  
539 *Lett.* **2020**, *7*, 937–942, doi:10.1021/acs.estlett.0c00730.
- 540 14. Farkas, K.; Adriaenssens, E.M.; Walker, D.I.; McDonald, J.E.; Malham, S.K.; Jones, D.L.  
541 Critical Evaluation of CrAssphage as a Molecular Marker for Human-Derived Wastewater  
542 Contamination in the Aquatic Environment. *Food Environ. Virol.* **2019**, *11*, 113–119,  
543 doi:10.1007/s12560-019-09369-1.
- 544 15. Langeveld, J.; Schilperoord, R.; Heijnen, L.; Elsinga, G.; Schapendonk, C.E.M.; Fanoy, E.;  
545 de Schepper, E.I.T.; Koopmans, M.P.G.; de Graaf, M.; Medema, G. *Normalisation of*  
546 *SARS-CoV-2 Concentrations in Wastewater: The Use of Flow, Conductivity and*  
547 *CrAssphage*; Epidemiology, 2021;
- 548 16. Hoar, C.; Li, Y.; Silverman, A.I. Assessment of Commonly Measured Wastewater  
549 Parameters to Estimate Sewershed Populations for Use in Wastewater-Based  
550 Epidemiology: Insights into Population Dynamics in New York City during the COVID-19  
551 Pandemic. *ACS EST Water* **2022**, acsestwater.2c00052,  
552 doi:10.1021/acsestwater.2c00052.
- 553 17. Yaniv, K.; Shagan, M.; Lewis, Y.E.; Kramarsky-Winter, E.; Weil, M.; Indenbaum, V.; Elul,  
554 M.; Erster, O.; Brown, A.S.; Mendelson, E.; et al. City-Level SARS-CoV-2 Sewage  
555 Surveillance. *Chemosphere* **2021**, *283*, 131194, doi:10.1016/j.chemosphere.2021.131194.
- 556 18. Carducci, A.; Federigi, I.; Liu, D.; Thompson, J.R.; Verani, M. Making Waves: Coronavirus  
557 Detection, Presence and Persistence in the Water Environment: State of the Art and  
558 Knowledge Needs for Public Health. *Water Res.* **2020**, *179*, 115907,  
559 doi:10.1016/j.watres.2020.115907.
- 560 19. CDC Wastewater Surveillance Testing Methods Available online:  
561 [https://www.cdc.gov/healthywater/surveillance/wastewater-surveillance/testing-](https://www.cdc.gov/healthywater/surveillance/wastewater-surveillance/testing-methods.html)  
562 [methods.html](https://www.cdc.gov/healthywater/surveillance/wastewater-surveillance/testing-methods.html) (accessed on 14 November 2022).
- 563 20. Noh, J.; Danuser, G. Estimation of the Fraction of COVID-19 Infected People in U.S.  
564 States and Countries Worldwide. *PLOS ONE* **2021**, *16*, e0246772,  
565 doi:10.1371/journal.pone.0246772.
- 566 21. World Health Organization *Public Health Criteria to Adjust Public Health and Social*  
567 *Measures in the Context of COVID-19: Annex to Considerations in Adjusting Public Health*  
568 *and Social Measures in the Context of COVID-19*; World Health Organization, 2020;
- 569 22. Chiu, W.A.; Ndeffo-Mbah, M.L. Using Test Positivity and Reported Case Rates to Estimate  
570 State-Level COVID-19 Prevalence and Seroprevalence in the United States. *PLOS*  
571 *Comput. Biol.* **2021**, *17*, e1009374, doi:10.1371/journal.pcbi.1009374.
- 572 23. Daza-Torres, M.L.; Montesinos-López, J.C.; Kim, M.; Olson, R.; Bess, C.W.; Rueda, L.;  
573 Susa, M.; Tucker, L.; García, Y.E.; Schmidt, A.J.; et al. Model Training Periods Impact  
574 Estimation of COVID-19 Incidence from Wastewater Viral Loads. *Sci. Total Environ.* **2022**,  
575 159680, doi:10.1016/j.scitotenv.2022.159680.
- 576 24. Feng, S.; Roguet, A.; McClary-Gutierrez, J.S.; Newton, R.J.; Kloczko, N.; Meiman, J.G.;  
577 McLellan, S.L. Evaluation of Sampling, Analysis, and Normalization Methods for SARS-  
578 CoV-2 Concentrations in Wastewater to Assess COVID-19 Burdens in Wisconsin  
579 Communities. *ACS EST Water* **2021**, *1*, 1955–1965, doi:10.1021/acsestwater.1c00160.

- 580 25. Maal-Bared, R.; Qiu, Y.; Li, Q.; Gao, T.; Hrudehy, S.E.; Bhavanam, S.; Ruecker, N.J.;  
581 Ellehoj, E.; Lee, B.E.; Pang, X. Does Normalization of SARS-CoV-2 Concentrations by  
582 Pepper Mild Mottle Virus Improve Correlations and Lead Time between Wastewater  
583 Surveillance and Clinical Data in Alberta (Canada): Comparing Twelve SARS-CoV-2  
584 Normalization Approaches. *Sci. Total Environ.* **2023**, *856*, 158964,  
585 doi:10.1016/j.scitotenv.2022.158964.
- 586 26. Mitranescu, A.; Uchaikina, A.; Kau, A.-S.; Stange, C.; Ho, J.; Tiehm, A.; Wurzbacher, C.;  
587 Drewes, J.E. Wastewater-Based Epidemiology for SARS-CoV-2 Biomarkers: Evaluation of  
588 Normalization Methods in Small and Large Communities in Southern Germany. *ACS EST*  
589 *Water* **2022**, doi:10.1021/acsestwater.2c00306.
- 590 27. Hamed, K.H. Effect of Persistence on the Significance of Kendall's Tau as a Measure of  
591 Correlation between Natural Time Series. *Eur. Phys. J. Spec. Top.* **2009**, *174*, 65–79,  
592 doi:10.1140/epjst/e2009-01090-x.
- 593 28. Wolfe, M.K.; Archana, A.; Catoe, D.; Coffman, M.M.; Dorevich, S.; Graham, K.E.; Kim, S.;  
594 Grijalva, L.M.; Roldan-Hernandez, L.; Silverman, A.I.; et al. Scaling of SARS-CoV-2 RNA  
595 in Settled Solids from Multiple Wastewater Treatment Plants to Compare Incidence Rates  
596 of Laboratory-Confirmed COVID-19 in Their Sewersheds. *Environ. Sci. Technol. Lett.*  
597 **2021**, *8*, 398–404, doi:10.1021/acs.estlett.1c00184.
- 598 29. Nourbakhsh, S.; Fazil, A.; Li, M.; Mangat, C.S.; Peterson, S.W.; Daigle, J.; Langner, S.;  
599 Shurgold, J.; D'Aoust, P.; Delatolla, R.; et al. A Wastewater-Based Epidemic Model for  
600 SARS-CoV-2 with Application to Three Canadian Cities. *Epidemics* **2022**, *39*, 100560,  
601 doi:10.1016/j.epidem.2022.100560.
- 602 30. Rodríguez Rasero, F.J.; Moya Ruano, L.A.; Rasero Del Real, P.; Cuberos Gómez, L.;  
603 Lorusso, N. Associations between SARS-CoV-2 RNA Concentrations in Wastewater and  
604 COVID-19 Rates in Days after Sampling in Small Urban Areas of Seville: A Time Series  
605 Study. *Sci. Total Environ.* **2022**, *806*, 150573, doi:10.1016/j.scitotenv.2021.150573.
- 606 31. Zdenkova, K.; Bartackova, J.; Cermakova, E.; Demnerova, K.; Dostalkova, A.; Janda, V.;  
607 Jarkovsky, J.; Lopez Marin, M.A.; Novakova, Z.; Rumlova, M.; et al. Monitoring COVID-19  
608 Spread in Prague Local Neighborhoods Based on the Presence of SARS-CoV-2 RNA in  
609 Wastewater Collected throughout the Sewer Network. *Water Res.* **2022**, *216*, 118343,  
610 doi:10.1016/j.watres.2022.118343.
- 611 32. Kantor, R.S.; Greenwald, H.D.; Kennedy, L.C.; Hinkle, A.; Harris-Lovett, S.; Metzger, M.;  
612 Thornton, M.M.; Paluba, J.M.; Nelson, K.L. Operationalizing a Routine Wastewater  
613 Monitoring Laboratory for SARS-CoV-2. *PLOS Water* **2022**, *1*, e0000007,  
614 doi:10.1371/journal.pwat.0000007.
- 615 33. Whitney, O.N.; Kennedy, L.C.; Fan, V.B.; Hinkle, A.; Kantor, R.; Greenwald, H.; Crits-  
616 Christoph, A.; Al-Shayeb, B.; Chaplin, M.; Maurer, A.C.; et al. Sewage, Salt, Silica, and  
617 SARS-CoV-2 (4S): An Economical Kit-Free Method for Direct Capture of SARS-CoV-2  
618 RNA from Wastewater. *Environ. Sci. Technol.* **2021**, *55*, 4880–4888,  
619 doi:10.1021/acs.est.0c08129.
- 620 34. Menne, M.J.; Durre, I.; Korzeniewski, B.; McNeill, S.; Thomas, K.; Yin, X.; Anthony, S.;  
621 Ray, R.; Vose, R.S.; Gleason, B.E.; et al. Global Historical Climatology Network - Daily  
622 (GHCN-Daily), Version 3 2012.
- 623 35. COVID-19 Time-Series Metrics by County and State 2022.
- 624 36. CDPH COVID-19 Variant Data Available online: [https://data.chhs.ca.gov/dataset/covid-19-](https://data.chhs.ca.gov/dataset/covid-19-variant-data)  
625 [variant-data](https://data.chhs.ca.gov/dataset/covid-19-variant-data) (accessed on 17 November 2022).
- 626 37. COVID CG Available online: <https://covidcg.org/> (accessed on 22 November 2022).
- 627 38. Zheng, X.; Li, S.; Deng, Y.; Xu, X.; Ding, J.; Lau, F.T.K.; In Yau, C.; Poon, L.L.M.; Tun,  
628 H.M.; Zhang, T. Quantification of SARS-CoV-2 RNA in Wastewater Treatment Plants  
629 Mirrors the Pandemic Trend in Hong Kong. *Sci. Total Environ.* **2022**, *844*, 157121,  
630 doi:10.1016/j.scitotenv.2022.157121.

- 631 39. Graham, K.E.; Loeb, S.K.; Wolfe, M.K.; Catoe, D.; Sinnott-Armstrong, N.; Kim, S.;  
632 Yamahara, K.M.; Sassoubre, L.M.; Mendoza Grijalva, L.M.; Roldan-Hernandez, L.; et al.  
633 SARS-CoV-2 RNA in Wastewater Settled Solids Is Associated with COVID-19 Cases in a  
634 Large Urban Sewershed. *Environ. Sci. Technol.* **2021**, *55*, 488–498,  
635 doi:10.1021/acs.est.0c06191.
- 636 40. Kim, S.; Kennedy, L.C.; Wolfe, M.K.; Criddle, C.S.; Duong, D.H.; Topol, A.; White, B.J.;  
637 Kantor, R.S.; Nelson, K.L.; Steele, J.A.; et al. *SARS-CoV-2 RNA Is Enriched by Orders of*  
638 *Magnitude in Solid Relative to Liquid Wastewater at Publicly Owned Treatment Works;*  
639 *Infectious Diseases (except HIV/AIDS), 2021;*
- 640 41. Nagarkar, M.; Keely, S.P.; Jahne, M.; Wheaton, E.; Hart, C.; Smith, B.; Garland, J.;  
641 Varughese, E.A.; Braam, A.; Wiechman, B.; et al. SARS-CoV-2 Monitoring at Three  
642 Sewersheds of Different Scales and Complexity Demonstrates Distinctive Relationships  
643 between Wastewater Measurements and COVID-19 Case Data. *Sci. Total Environ.* **2021**,  
644 151534, doi:10.1016/j.scitotenv.2021.151534.
- 645 42. Gudra, D.; Dejus, S.; Bartkevics, V.; Roga, A.; Kalnina, I.; Strods, M.; Rayan, A.; Kokina,  
646 K.; Zajakina, A.; Dumpis, U.; et al. Detection of SARS-CoV-2 RNA in Wastewater and  
647 Importance of Population Size Assessment in Smaller Cities: An Exploratory Case Study  
648 from Two Municipalities in Latvia. *Sci. Total Environ.* **2022**, *823*, 153775,  
649 doi:10.1016/j.scitotenv.2022.153775.
- 650 43. Centers for Disease Control and Prevention Developing a Wastewater Surveillance  
651 Sampling Strategy 2022.
- 652 44. Hill, D.T.; Cousins, H.; Dandaraw, B.; Faruolo, C.; Godinez, A.; Run, S.; Smith, S.;  
653 Willkens, M.; Zirath, S.; Larsen, D.A. Wastewater Treatment Plant Operators Report High  
654 Capacity to Support Wastewater Surveillance for COVID-19 across New York State, USA.  
655 *Sci. Total Environ.* **2022**, *837*, 155664, doi:10.1016/j.scitotenv.2022.155664.
- 656 45. Lieberman-Cribbin, W.; Tuminello, S.; Flores, R.M.; Taioli, E. Disparities in COVID-19  
657 Testing and Positivity in New York City. *Am. J. Prev. Med.* **2020**, *59*, 326–332,  
658 doi:10.1016/j.amepre.2020.06.005.
- 659 46. Vaughan, L.; Zhang, M.; Gu, H.; Rose, J.B.; Naughton, C.C.; Medema, G.; Allan, V.; Roiko,  
660 A.; Blackall, L.; Zamyadi, A. An Exploration of Challenges Associated with Machine  
661 Learning for Time Series Forecasting of COVID-19 Community Spread Using Wastewater-  
662 Based Epidemiological Data. *Sci. Total Environ.* **2023**, *858*, 159748,  
663 doi:10.1016/j.scitotenv.2022.159748.
- 664 47. Medina, C.Y.; Kadonsky, K.F.; Roman, F.A.; Tariqi, A.Q.; Sinclair, R.G.; D'Aoust, P.M.;  
665 Delatolla, R.; Bischel, H.N.; Naughton, C.C. The Need of an Environmental Justice  
666 Approach for Wastewater Based Epidemiology for Rural and Disadvantaged Communities:  
667 A Review in California. *Curr. Opin. Environ. Sci. Health* **2022**, *27*, 100348,  
668 doi:10.1016/j.coesh.2022.100348.
- 669 48. Olesen, S.W.; Imakaev, M.; Duvallet, C. Making Waves: Defining the Lead Time of  
670 Wastewater-Based Epidemiology for COVID-19. *Water Res.* **2021**, *202*, 117433,  
671 doi:10.1016/j.watres.2021.117433.
- 672 49. Bibby, K.; Bivins, A.; Wu, Z.; North, D. Making Waves: Plausible Lead Time for Wastewater  
673 Based Epidemiology as an Early Warning System for COVID-19. *Water Res.* **2021**, *202*,  
674 117438, doi:10.1016/j.watres.2021.117438.
- 675 50. Xiao, A.; Wu, F.; Bushman, M.; Zhang, J.; Imakaev, M.; Chai, P.R.; Duvallet, C.; Endo, N.;  
676 Erickson, T.B.; Armas, F.; et al. Metrics to Relate COVID-19 Wastewater Data to Clinical  
677 Testing Dynamics. *Water Res.* **2022**, 118070, doi:10.1016/j.watres.2022.118070.
- 678 51. Li, B.; Deng, A.; Li, K.; Hu, Y.; Li, Z.; Shi, Y.; Xiong, Q.; Liu, Z.; Guo, Q.; Zou, L.; et al. Viral  
679 Infection and Transmission in a Large, Well-Traced Outbreak Caused by the SARS-CoV-2  
680 Delta Variant. *Nat. Commun.* **2022**, *13*, 460, doi:10.1038/s41467-022-28089-y.
- 681 52. Prasek, S.M.; Pepper, I.L.; Innes, G.K.; Sliniski, S.; Ruedas, M.; Sanchez, A.; Brierley, P.;

- 682 Betancourt, W.Q.; Stark, E.R.; Foster, A.R.; et al. Population Level SARS-CoV-2 Fecal  
683 Shedding Rates Determined via Wastewater-Based Epidemiology. *Sci. Total Environ.*  
684 **2022**, 838, 156535, doi:10.1016/j.scitotenv.2022.156535.
- 685 53. Bloemen, M.; Delang, L.; Rector, A.; Raymenants, J.; Thibaut, J.; Pussig, B.; Fondu, L.;  
686 Aertgeerts, B.; Van Ranst, M.; Van Geet, C.; et al. *Detection Of SARS-COV-2 Variants Of*  
687 *Concern In Wastewater Of Leuven, Belgium*; *Epidemiology*, 2022;
- 688 54. Yuan, S.; Ye, Z.-W.; Liang, R.; Tang, K.; Zhang, A.J.; Lu, G.; Ong, C.P.; Poon, V.K.-M.;  
689 Chan, C.C.-S.; Mok, B.W.-Y.; et al. *The SARS-CoV-2 Omicron (B.1.1.529) Variant Exhibits*  
690 *Altered Pathogenicity, Transmissibility, and Fitness in the Golden Syrian Hamster Model*;  
691 *Microbiology*, 2022;
- 692 55. Bramante, C.T.; Proper, J.L.; Boulware, D.R.; Karger, A.B.; Murray, T.; Rao, V.; Hagen, A.;  
693 Tignanelli, C.J.; Puskarich, M.; Cohen, K.; et al. Vaccination Against SARS-CoV-2 Is  
694 Associated With a Lower Viral Load and Likelihood of Systemic Symptoms. *Open Forum*  
695 *Infect. Dis.* **2022**, 9, ofac066, doi:10.1093/ofid/ofac066.
- 696 56. Levine-Tiefenbrun, M.; Yelin, I.; Katz, R.; Herzog, E.; Golan, Z.; Schreiber, L.; Wolf, T.;  
697 Nadler, V.; Ben-Tov, A.; Kuint, J.; et al. Initial Report of Decreased SARS-CoV-2 Viral Load  
698 after Inoculation with the BNT162b2 Vaccine. *Nat. Med.* **2021**, 27, 790–792,  
699 doi:10.1038/s41591-021-01316-7.
- 700 57. McEllistrem, M.C.; Clancy, C.J.; Buehrle, D.J.; Lucas, A.; Decker, B.K. Single Dose of an  
701 mRNA Severe Acute Respiratory Syndrome Coronavirus 2 (SARS-Cov-2) Vaccine Is  
702 Associated With Lower Nasopharyngeal Viral Load Among Nursing Home Residents With  
703 Asymptomatic Coronavirus Disease 2019 (COVID-19). *Clin. Infect. Dis.* **2021**, 73, e1365–  
704 e1367, doi:10.1093/cid/ciab263.
- 705 58. Zhang, N.; Gong, Y.; Meng, F.; Shi, Y.; Wang, J.; Mao, P.; Chuai, X.; Bi, Y.; Yang, P.;  
706 Wang, F. Comparative Study on Virus Shedding Patterns in Nasopharyngeal and Fecal  
707 Specimens of COVID-19 Patients. *Sci. China Life Sci.* **2021**, 64, 486–488,  
708 doi:10.1007/s11427-020-1783-9.
