# Supplementary material for: The dynamic relationship between COVID-19 cases and SARS-CoV-2 wastewater concentrations across time and space: considerations for model training data sets
Source: bioRxiv or medRxiv preprint supplement (doi:10.1101/2022.11.23.22282684), 2022-11-24
Supplement: Supplementary file [file media-1.pdf]

## Supplementary information

### The dynamic relationship between COVID-19 cases and SARS-CoV-2 wastewater concentrations across time and space: considerations for model training data sets

Rebecca Schill<sup>1</sup>, Kara L. Nelson<sup>2</sup>, Sasha Harris-Lovett<sup>3</sup>, Rose S. Kantor<sup>2\*</sup>

1. TUM School of Engineering and Design, Technical University of Munich, Germany

2. Civil and Environmental Engineering, University of California, Berkeley, CA, USA

3. Berkeley Water Center, University of California, Berkeley, CA, USA

\*corresponding author contact: rkantor@berkeley.edu

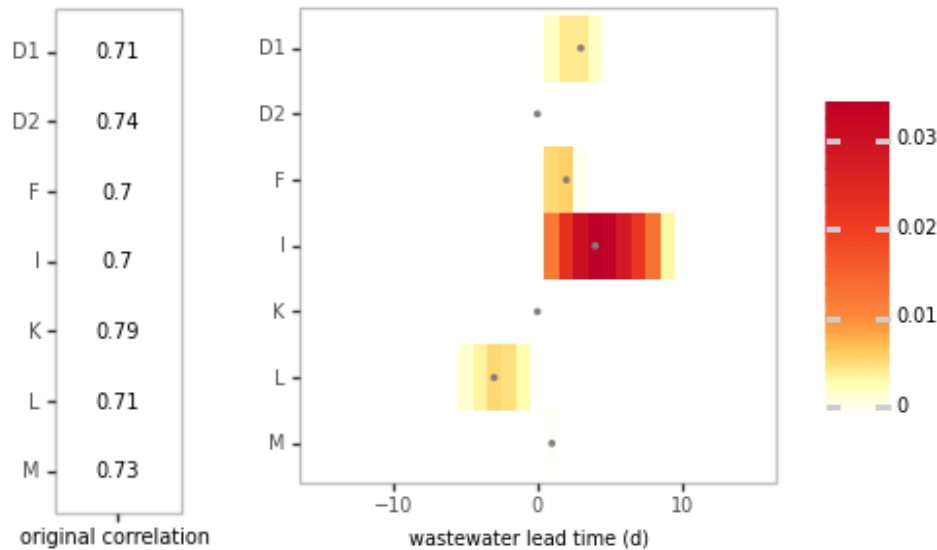

**Figure S1A.** Kendall's correlations between wastewater SARS-CoV-2 RNA and COVID-19 cases per 100,000 people without timeshift (left) and cross-correlation heatmap of changes in Kendall's tau after shifts of up to -14 to +14 days were applied to case data (right). The maximum correlation is indicated by gray points. Prior to correlation calculations, all wastewater data were flow-normalized, log-scaled, and lowess smoothed (with interpolation) to reduce noise, and all case data were converted to 7-day moving averages and log-scaled. Sewersheds were included only if they were sampled throughout the entire time series.

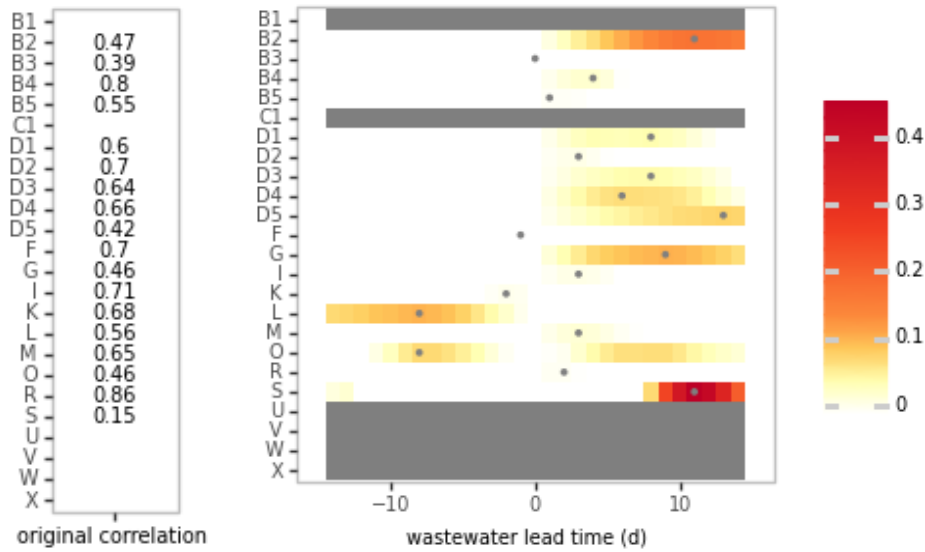

**Figure S1B.** Kendall's correlations between wastewater SARS-CoV-2 RNA and COVID-19 cases per 100,000 people during the Epsilon/Alpha variant-dominated surge without time shift (left) and after shifts of up to -14 to +14 days were applied to case data, (right), as in Figure S1A.

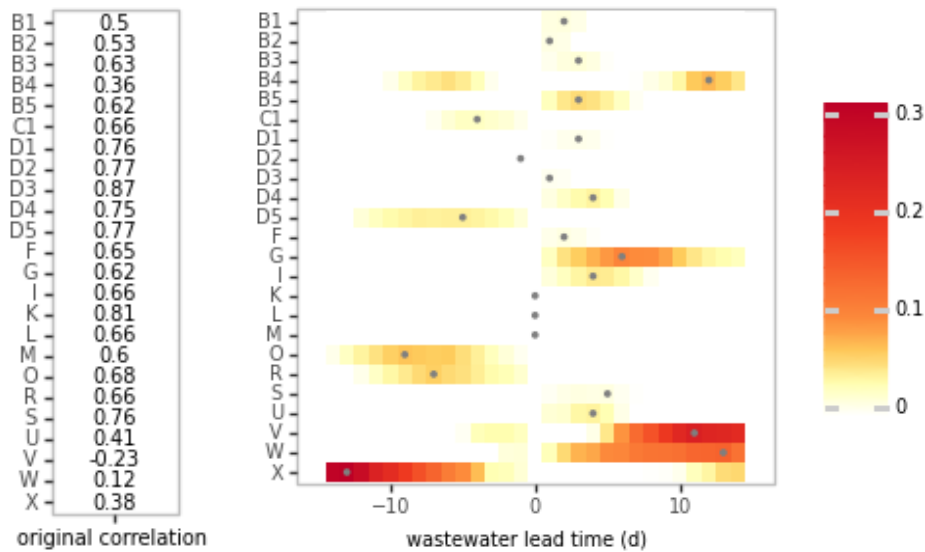

**Figure S1C.** Kendall's correlations between wastewater SARS-CoV-2 RNA and COVID-19 cases per 100,000 people during the Delta variant-dominated surge without time shift (left) and after shifts of up to -14 to +14 days were applied to case data, (right), as in Figure S1A.

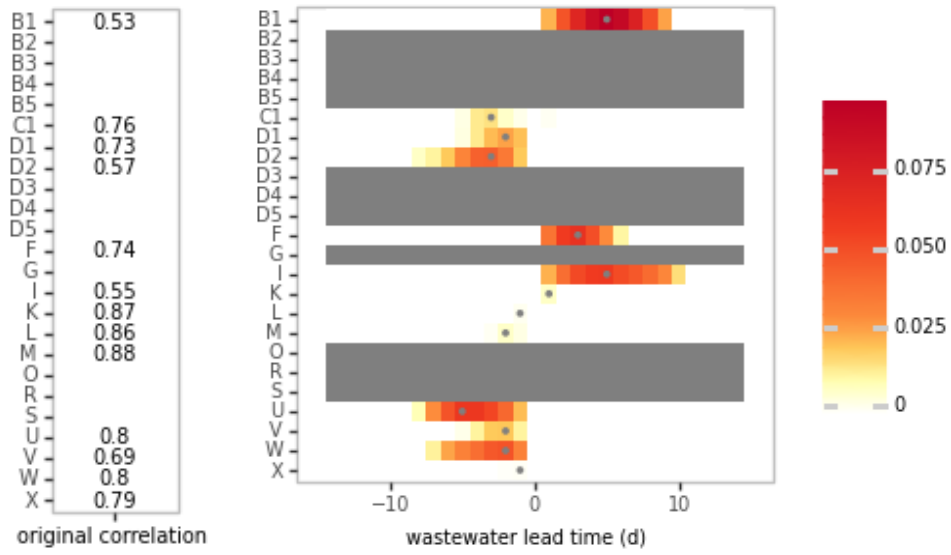

**Figure S1D.** Kendall's correlations between wastewater SARS-CoV-2 RNA and COVID-19 cases per 100,000 people during the Omicron BA.1 variant-dominated surge without time shift (left) and after shifts of up to -14 to +14 days were applied to case data, (right), as in Figure S1A.

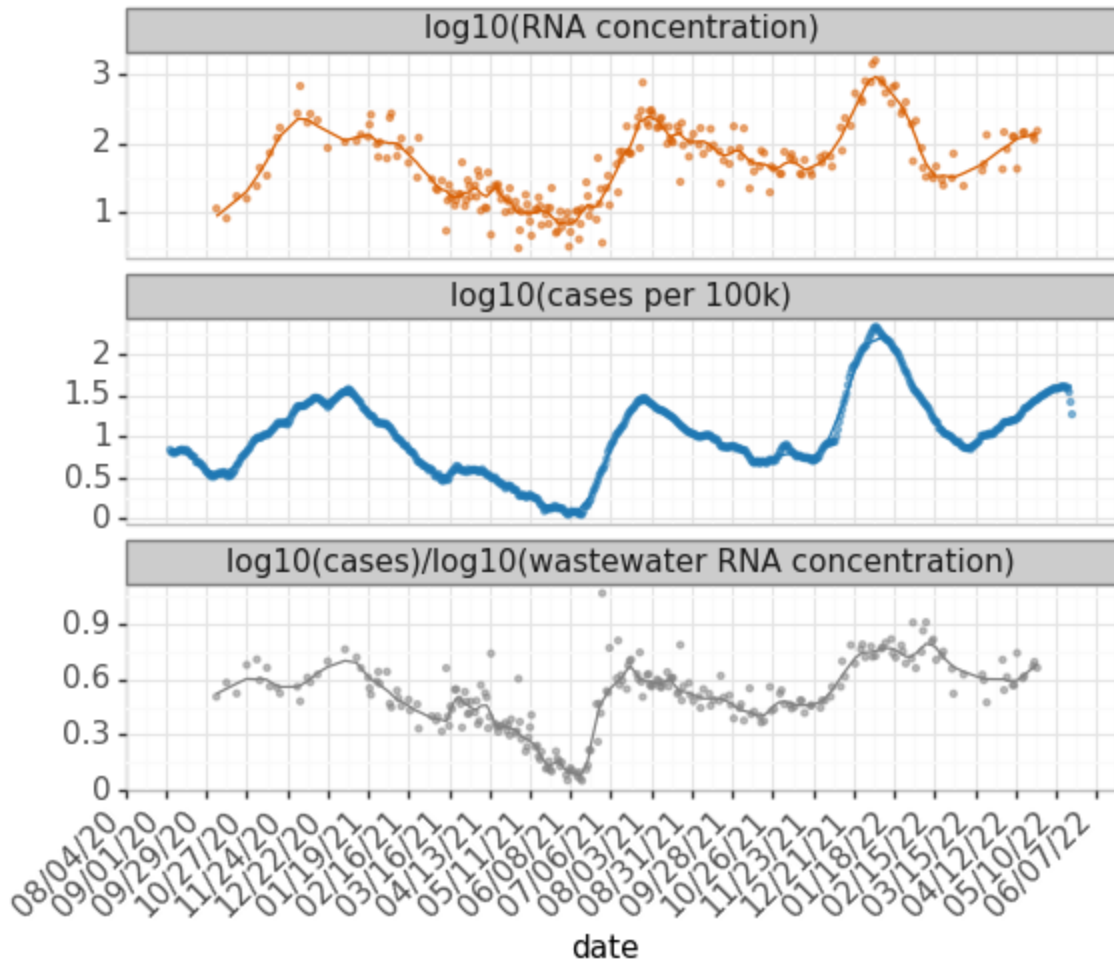

**Figure S2.** Time series of flow-normalized wastewater SARS-CoV-2 RNA concentration (gc/mL, orange), 7-day moving average COVID-19 cases per 100,000 people (blue), the ratio of log-scaled cases over log-scaled RNA concentration (gray), and lowess-smoothed curves (alpha = 0.05), at site D1 from August 25, 2020 to May 31, 2022.

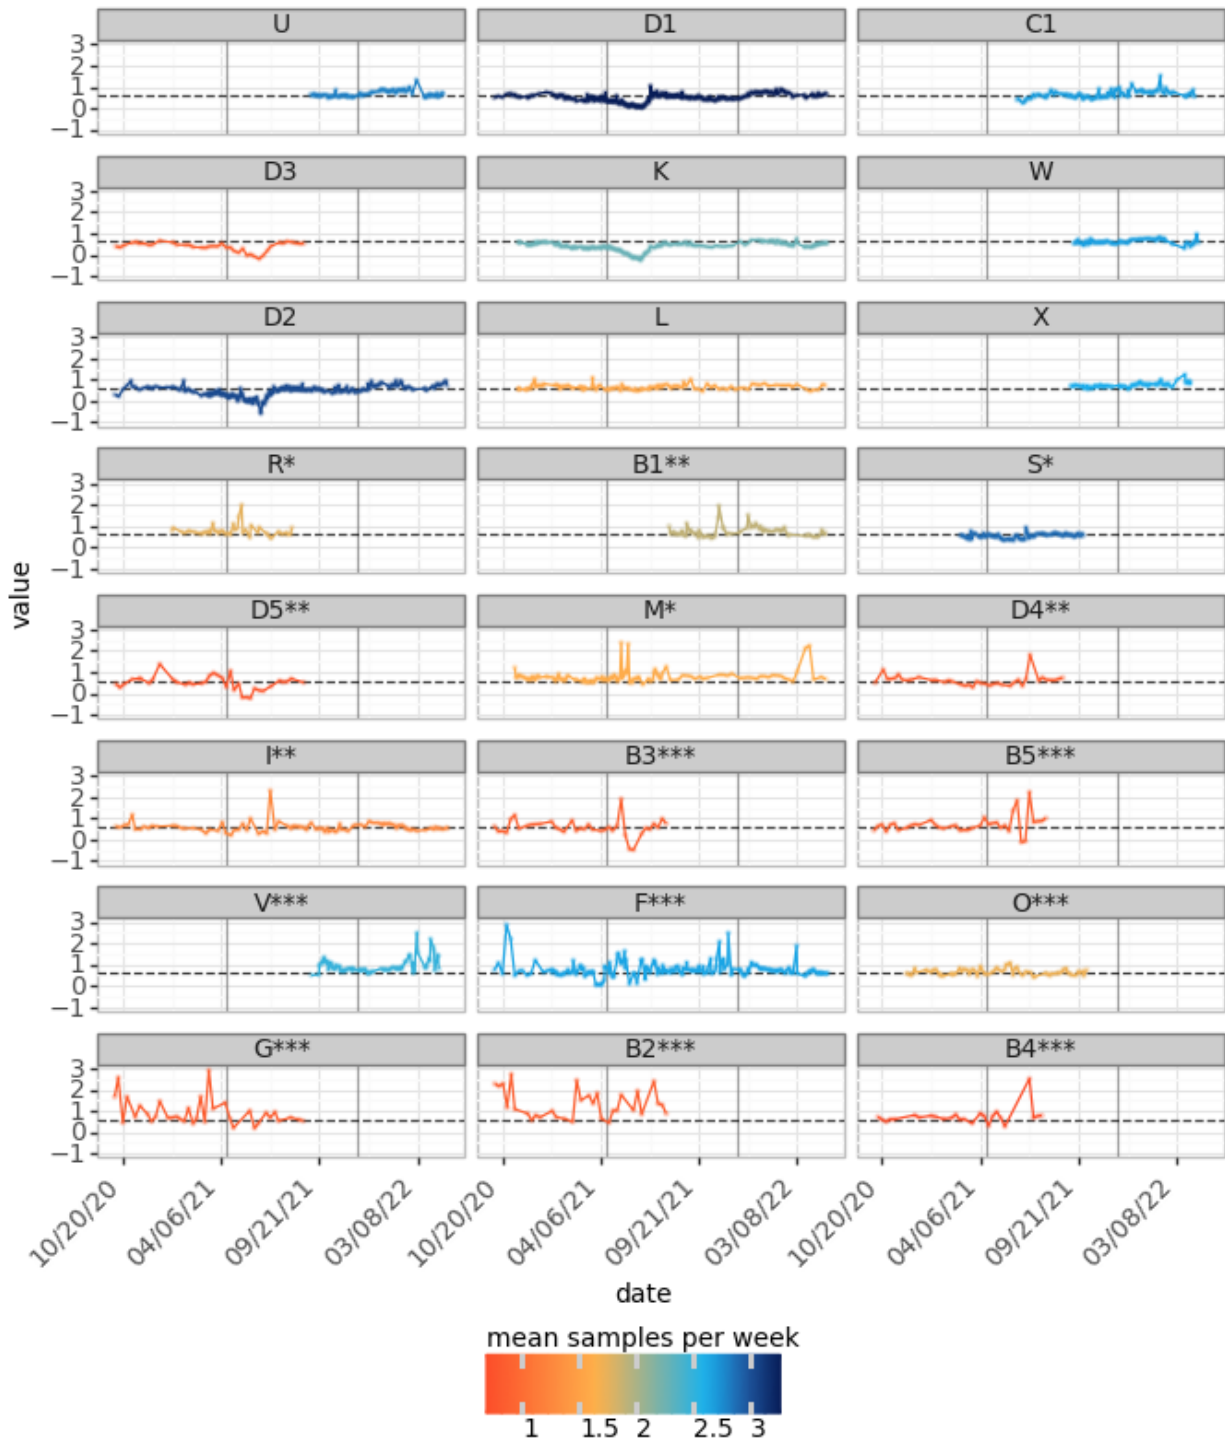

**Figure S3.** Time series of the ratio between  $\log_{10}(\text{COVID-19 cases})$  and  $\log_{10}(\text{wastewater SARS-CoV-2 RNA concentration})$  at 24 sites. Graphs are sorted by sewershed population and colored by mean weekly sampling frequency. Fraction of case data that is masked is represented by the following: \*0-0.05 \*\*0.05-0.33 \*\*\*>0.33. One outlier at site F was removed for visualization.

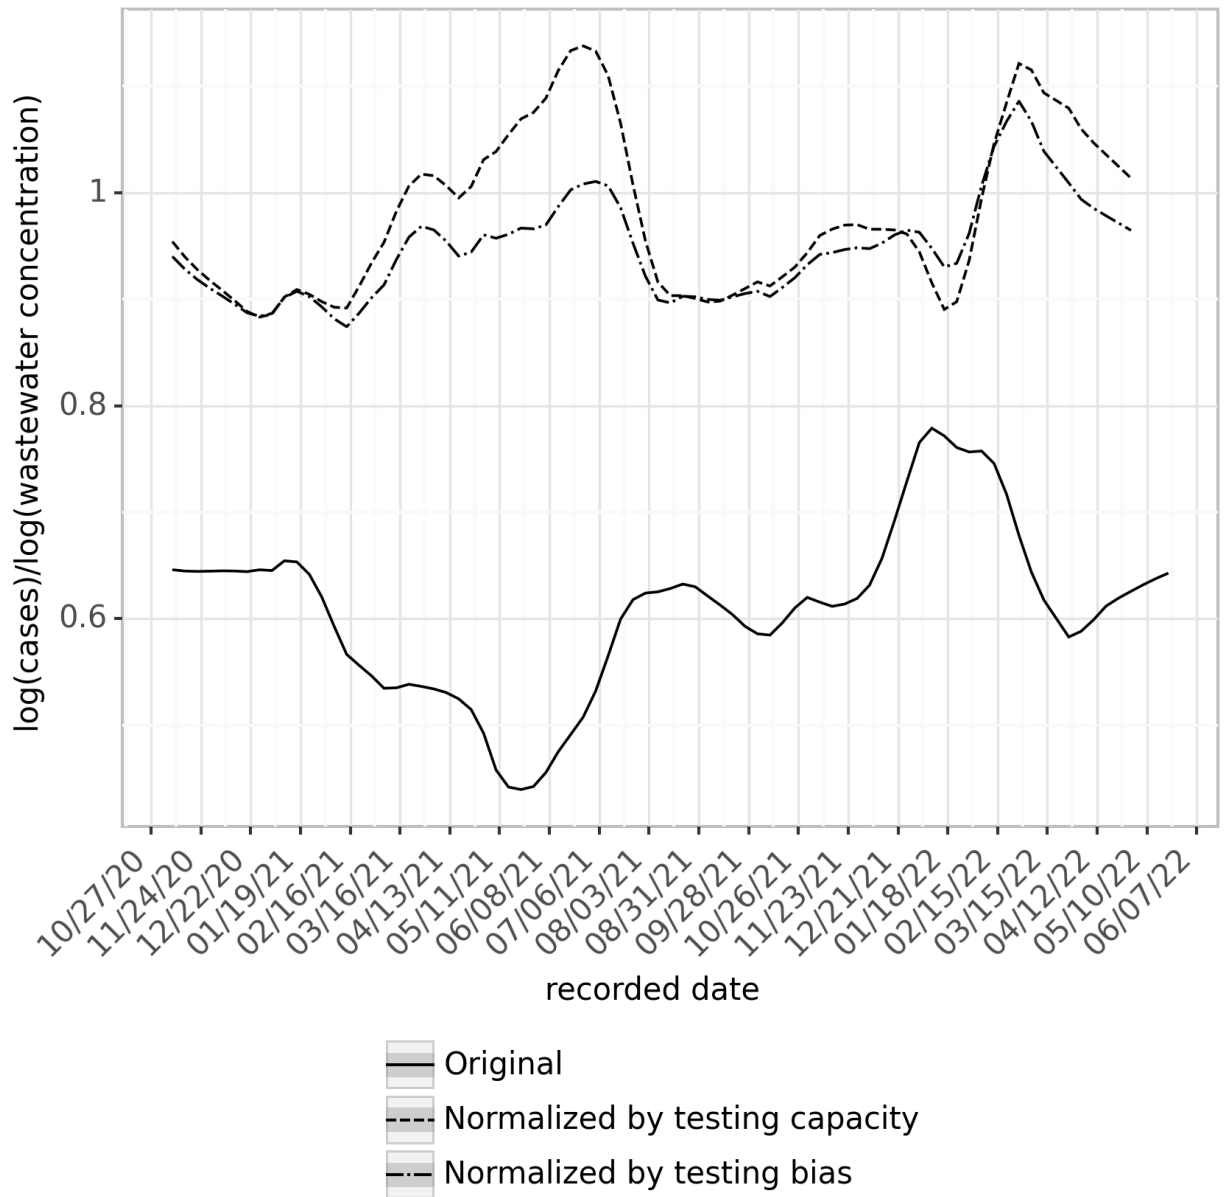

**Figure S4.** Lowess-smoothed ( $\alpha=0.1$ ) ratio of  $\log(\text{cases})$  to  $\log(\text{wastewater concentration})$  non-normalized, normalized by testing capacity (Eq. 4) and normalized by testing bias (Eq. 5) at 24 sewersheds. Averages were calculated for each week and each sewershed. For each sewershed, for a given week, a minimum of two data points was required for inclusion.

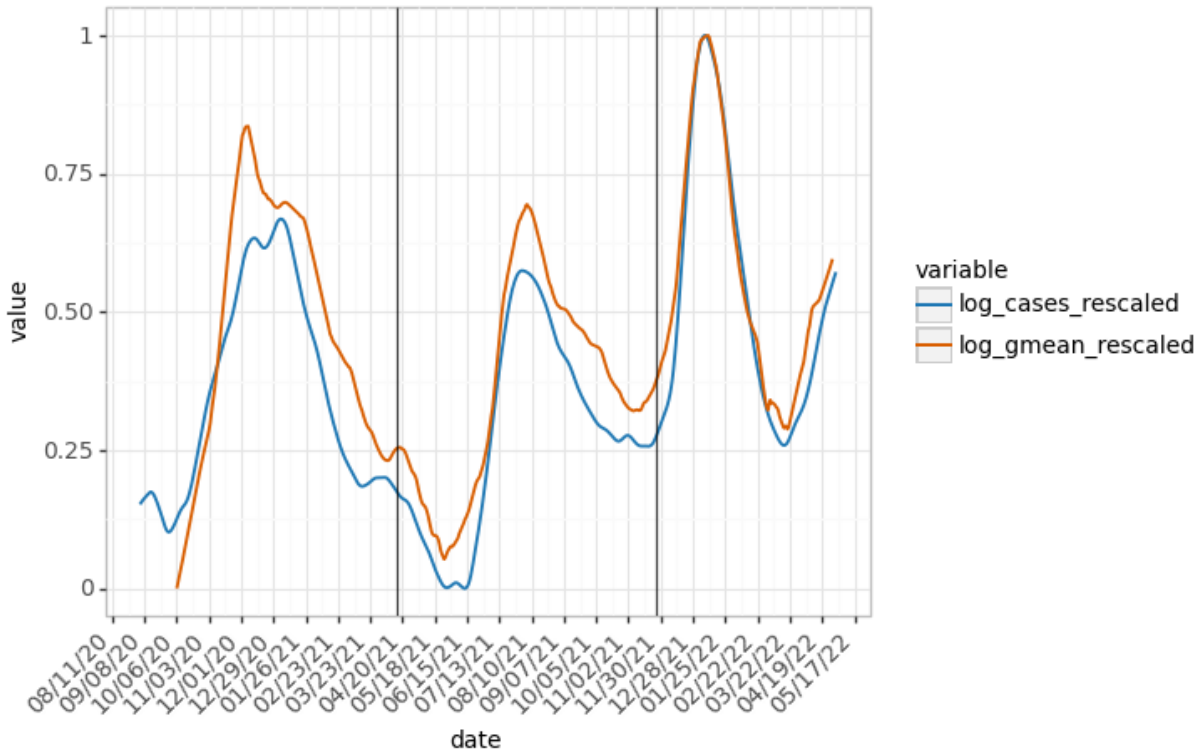

**Figure S5.** Lowess smoothed time series of log-scaled, flow-normalized wastewater SARS-CoV-2 RNA concentration (gc/mL, orange) and log-scaled, 7-day moving average COVID-19 cases per 100,000 people (blue) at sites D1, D2, K, L, and M. Both time series were rescaled by defining the minimum as 0 and the maximum as 1.
